# Supplementary material for: Exploring the classification of cancer cell lines from multiple omic views
Source: PeerJ. 2020 Aug 18;8:e9440. doi: 10.7717/peerj.9440 (PMC7441922; doi:10.7717/peerj.9440)
Supplement: Table S2 [file peerj-08-9440-s007.xlsx]

## Sheet: Sheet1
Table S2： miRNA cluster membership.
Cell lines	cluster	TCGA disease	Number of cell lines
5637_URINARY_TRACT	1	BLCA	176
J82_URINARY_TRACT	1	BLCA
HT1197_URINARY_TRACT	1	BLCA
TCCSUP_URINARY_TRACT	1	BLCA
HT1376_URINARY_TRACT	1	BLCA
HCC1954_BREAST	1	BRCA
HMC18_BREAST	1	BRCA
MDAMB157_BREAST	1	BRCA
BT549_BREAST	1	BRCA
HDQP1_BREAST	1	BRCA
OUMS23_LARGE_INTESTINE	1	COAD/READ
COLO201_LARGE_INTESTINE	1	COAD/READ
C2BBE1_LARGE_INTESTINE	1	COAD/READ
HUTU80_SMALL_INTESTINE	1	COAD/READ
LS1034_LARGE_INTESTINE	1	COAD/READ
SW48_LARGE_INTESTINE	1	COAD/READ
NCIH747_LARGE_INTESTINE	1	COAD/READ
HT29_LARGE_INTESTINE	1	COAD/READ
COLO678_LARGE_INTESTINE	1	COAD/READ
COLO320_LARGE_INTESTINE	1	COAD/READ
KYSE410_OESOPHAGUS	1	ESCA
KYSE140_OESOPHAGUS	1	ESCA
TE9_OESOPHAGUS	1	ESCA
KYSE70_OESOPHAGUS	1	ESCA
TE11_OESOPHAGUS	1	ESCA
KYSE510_OESOPHAGUS	1	ESCA
LN229_CENTRAL_NERVOUS_SYSTEM	1	GBM
KNS60_CENTRAL_NERVOUS_SYSTEM	1	GBM
KNS81_CENTRAL_NERVOUS_SYSTEM	1	GBM
AM38_CENTRAL_NERVOUS_SYSTEM	1	GBM
A172_CENTRAL_NERVOUS_SYSTEM	1	GBM
YKG1_CENTRAL_NERVOUS_SYSTEM	1	GBM
8MGBA_CENTRAL_NERVOUS_SYSTEM	1	GBM
BICR6_UPPER_AERODIGESTIVE_TRACT	1	HNSC
BHY_UPPER_AERODIGESTIVE_TRACT	1	HNSC
BICR18_UPPER_AERODIGESTIVE_TRACT	1	HNSC
HSC2_UPPER_AERODIGESTIVE_TRACT	1	HNSC
HSC4_UPPER_AERODIGESTIVE_TRACT	1	HNSC
SCC9_UPPER_AERODIGESTIVE_TRACT	1	HNSC
BICR31_UPPER_AERODIGESTIVE_TRACT	1	HNSC
PECAPJ49_UPPER_AERODIGESTIVE_TRACT	1	HNSC
PECAPJ34CLONEC12_UPPER_AERODIGESTIVE_TRACT	1	HNSC
PECAPJ41CLONED2_UPPER_AERODIGESTIVE_TRACT	1	HNSC
DETROIT562_UPPER_AERODIGESTIVE_TRACT	1	HNSC
SCC15_UPPER_AERODIGESTIVE_TRACT	1	HNSC
769P_KIDNEY	1	KIRC
786O_KIDNEY	1	KIRC
KMRC2_KIDNEY	1	KIRC
KMRC1_KIDNEY	1	KIRC
BFTC909_KIDNEY	1	KIRC
MOLM16_HAEMATOPOIETIC_AND_LYMPHOID_TISSUE	1	LAML
GI1_CENTRAL_NERVOUS_SYSTEM	1	LGG
JHH7_LIVER	1	LIHC
HUH6_LIVER	1	LIHC
HUH7_LIVER	1	LIHC
SNU182_LIVER	1	LIHC
SNU423_LIVER	1	LIHC
SNU387_LIVER	1	LIHC
SNU475_LIVER	1	LIHC
SKHEP1_LIVER	1	LIHC
HEP3B217_LIVER	1	LIHC
PLCPRF5_LIVER	1	LIHC
NCIH2085_LUNG	1	LUAD
NCIH2342_LUNG	1	LUAD
CORL105_LUNG	1	LUAD
CALU6_LUNG	1	LUAD
SKLU1_LUNG	1	LUAD
RERFLCMS_LUNG	1	LUAD
NCIH1568_LUNG	1	LUAD
NCIH1563_LUNG	1	LUAD
NCIH3255_LUNG	1	LUAD
NCIH2023_LUNG	1	LUAD
NCIH1648_LUNG	1	LUAD
NCIH23_LUNG	1	LUAD
NCIH1373_LUNG	1	LUAD
NCIH1693_LUNG	1	LUAD
HCC44_LUNG	1	LUAD
NCIH522_LUNG	1	LUAD
HCC827_LUNG	1	LUAD
CALU3_LUNG	1	LUAD
NCIH1435_LUNG	1	LUAD
NCIH2073_LUNG	1	LUAD
EBC1_LUNG	1	LUSC
LUDLU1_LUNG	1	LUSC
HARA_LUNG	1	LUSC
KNS62_LUNG	1	LUSC
SW1573_LUNG	1	LUSC
RERFLCSQ1_LUNG	1	LUSC
NCIH1703_LUNG	1	LUSC
SQ1_LUNG	1	LUSC
KPNSI9S_AUTONOMIC_GANGLIA	1	NB
SKNSH_AUTONOMIC_GANGLIA	1	NB
CHP212_AUTONOMIC_GANGLIA	1	NB
RMUGS_OVARY	1	OV
COV318_OVARY	1	OV
OVK18_OVARY	1	OV
OVTOKO_OVARY	1	OV
OVCAR4_OVARY	1	OV
COV504_OVARY	1	OV
SKOV3_OVARY	1	OV
COV362_OVARY	1	OV
COV434_OVARY	1	OV
JHOS2_OVARY	1	OV
EFO27_OVARY	1	OV
IGROV1_OVARY	1	OV
TOV21G_OVARY	1	OV
FUOV1_OVARY	1	OV
HEYA8_OVARY	1	OV
TYKNU_OVARY	1	OV
TOV112D_OVARY	1	OV
EFO21_OVARY	1	OV
DOV13_OVARY	1	OV
SW1990_PANCREAS	1	PAAD
HPAC_PANCREAS	1	PAAD
SU8686_PANCREAS	1	PAAD
PANC0203_PANCREAS	1	PAAD
PATU8902_PANCREAS	1	PAAD
HUPT3_PANCREAS	1	PAAD
KP3_PANCREAS	1	PAAD
KP4_PANCREAS	1	PAAD
CAPAN1_PANCREAS	1	PAAD
SUIT2_PANCREAS	1	PAAD
PANC0813_PANCREAS	1	PAAD
PANC0504_PANCREAS	1	PAAD
MIAPACA2_PANCREAS	1	PAAD
KP2_PANCREAS	1	PAAD
PANC0327_PANCREAS	1	PAAD
HUPT4_PANCREAS	1	PAAD
TC71_BONE	1	SARC
HT1080_SOFT_TISSUE	1	SARC
A673_BONE	1	SARC
MESSA_SOFT_TISSUE	1	SARC
SAOS2_BONE	1	SARC
SKES1_BONE	1	SARC
TE617T_SOFT_TISSUE	1	SARC
HS729_SOFT_TISSUE	1	SARC
SW1353_BONE	1	SARC
S117_THYROID	1	SARC
DMS53_LUNG	1	SCLC
SW1271_LUNG	1	SCLC
DMS454_LUNG	1	SCLC
CORL47_LUNG	1	SCLC
DMS114_LUNG	1	SCLC
SBC5_LUNG	1	SCLC
NCIH196_LUNG	1	SCLC
NCIH211_LUNG	1	SCLC
NCIH2196_LUNG	1	SCLC
WM115_SKIN	1	SKCM
WM793_SKIN	1	SKCM
IGR39_SKIN	1	SKCM
HT144_SKIN	1	SKCM
HS695T_SKIN	1	SKCM
HS294T_SKIN	1	SKCM
RERFGC1B_STOMACH	1	STAD
HS746T_STOMACH	1	STAD
FU97_STOMACH	1	STAD
SH10TC_STOMACH	1	STAD
MKN74_STOMACH	1	STAD
HGC27_STOMACH	1	STAD
AGS_STOMACH	1	STAD
NUGC3_STOMACH	1	STAD
MKN7_STOMACH	1	STAD
2313287_STOMACH	1	STAD
8305C_THYROID	1	THCA
8505C_THYROID	1	THCA
BCPAP_THYROID	1	THCA
ML1_THYROID	1	THCA
KLE_ENDOMETRIUM	1	UCEC
HEC151_ENDOMETRIUM	1	UCEC
MFE280_ENDOMETRIUM	1	UCEC
MFE319_ENDOMETRIUM	1	UCEC
HEC265_ENDOMETRIUM	1	UCEC
HEC59_ENDOMETRIUM	1	UCEC
EN_ENDOMETRIUM	1	UCEC
ESS1_ENDOMETRIUM	1	UCEC
AN3CA_ENDOMETRIUM	1	UCEC
SW1710_URINARY_TRACT	2	BLCA	95
VMCUB1_URINARY_TRACT	2	BLCA
BC3C_URINARY_TRACT	2	BLCA
639V_URINARY_TRACT	2	BLCA
647V_URINARY_TRACT	2	BLCA
HCC38_BREAST	2	BRCA
EFM192A_BREAST	2	BRCA
CAL148_BREAST	2	BRCA
HCC1599_BREAST	2	BRCA
UACC893_BREAST	2	BRCA
HCC1419_BREAST	2	BRCA
CAL120_BREAST	2	BRCA
HUH28_BILIARY_TRACT	2	CHOL
SW1116_LARGE_INTESTINE	2	COAD/READ
NCIH716_LARGE_INTESTINE	2	COAD/READ
HT115_LARGE_INTESTINE	2	COAD/READ
HCT15_LARGE_INTESTINE	2	COAD/READ
CCK81_LARGE_INTESTINE	2	COAD/READ
SNU407_LARGE_INTESTINE	2	COAD/READ
HS675T_FIBROBLAST	2	COAD/READ
RCM1_LARGE_INTESTINE	2	COAD/READ
SW620_LARGE_INTESTINE	2	COAD/READ
LOVO_LARGE_INTESTINE	2	COAD/READ
SW948_LARGE_INTESTINE	2	COAD/READ
KM12_LARGE_INTESTINE	2	COAD/READ
T84_LARGE_INTESTINE	2	COAD/READ
CL14_LARGE_INTESTINE	2	COAD/READ
CL40_LARGE_INTESTINE	2	COAD/READ
HS698T_FIBROBLAST	2	COAD/READ
CL11_LARGE_INTESTINE	2	COAD/READ
SF295_CENTRAL_NERVOUS_SYSTEM	2	GBM
GMS10_CENTRAL_NERVOUS_SYSTEM	2	GBM
FADU_UPPER_AERODIGESTIVE_TRACT	2	HNSC
CAKI1_KIDNEY	2	KIRC
A498_KIDNEY	2	KIRC
KMRC3_KIDNEY	2	KIRC
MUTZ3_HAEMATOPOIETIC_AND_LYMPHOID_TISSUE	2	LAML
SNU761_LIVER	2	LIHC
JHH6_LIVER	2	LIHC
HEPG2_LIVER	2	LIHC
HCC2279_LUNG	2	LUAD
HCC366_LUNG	2	LUAD
HCC1195_LUNG	2	LUAD
NCIH1623_LUNG	2	LUAD
NCIH1755_LUNG	2	LUAD
NCIH2122_LUNG	2	LUAD
NCIH1395_LUNG	2	LUAD
LXF289_LUNG	2	LUAD
NCIH226_LUNG	2	LUSC
EPLC272H_LUNG	2	LUSC
HLFA_FIBROBLAST	2	LUSC
DAOY_CENTRAL_NERVOUS_SYSTEM	2	MB
ISTMES1_PLEURA	2	MESO
MPP89_PLEURA	2	MESO
JL1_PLEURA	2	MESO
COV644_OVARY	2	OV
OV7_OVARY	2	OV
OAW42_OVARY	2	OV
OVISE_OVARY	2	OV
RMGI_OVARY	2	OV
ONCODG1_OVARY	2	OV
SNU324_PANCREAS	2	PAAD
DANG_PANCREAS	2	PAAD
CFPAC1_PANCREAS	2	PAAD
YAPC_PANCREAS	2	PAAD
PATU8988T_PANCREAS	2	PAAD
VCAP_PROSTATE	2	PRAD
MDAPCA2B_PROSTATE	2	PRAD
LNCAPCLONEFGC_PROSTATE	2	PRAD
T173_FIBROBLAST	2	SARC
HS870T_FIBROBLAST	2	SARC
SJSA1_BONE	2	SARC
RDES_BONE	2	SARC
G292CLONEA141B1_BONE	2	SARC
HS863T_FIBROBLAST	2	SARC
COLO668_LUNG	2	SCLC
CORL95_LUNG	2	SCLC
NCIH841_LUNG	2	SCLC
HS895T_FIBROBLAST	2	SKCM
HS940T_FIBROBLAST	2	SKCM
IGR1_SKIN	2	SKCM
A2058_SKIN	2	SKCM
HS839T_FIBROBLAST	2	SKCM
HS688AT_FIBROBLAST	2	SKCM
HS934T_FIBROBLAST	2	SKCM
SNU216_STOMACH	2	STAD
CGTHW1_THYROID	2	THCA
FTC133_THYROID	2	THCA
TT_THYROID	2	THCA
CAL62_THYROID	2	THCA
BHT101_THYROID	2	THCA
TT2609C02_THYROID	2	THCA
HEC1B_ENDOMETRIUM	2	UCEC
HEC1A_ENDOMETRIUM	2	UCEC
JHUEM7_ENDOMETRIUM	2	UCEC
HCC2157_BREAST	3	BRCA	85
DU4475_BREAST	3	BRCA
T47D_BREAST	3	BRCA
KPL1_BREAST	3	BRCA
HCC2218_BREAST	3	BRCA
CAMA1_BREAST	3	BRCA
MDAMB361_BREAST	3	BRCA
SKBR3_BREAST	3	BRCA
HCC1143_BREAST	3	BRCA
HCC1937_BREAST	3	BRCA
HCC1187_BREAST	3	BRCA
ZR751_BREAST	3	BRCA
MCF7_BREAST	3	BRCA
HCC202_BREAST	3	BRCA
MDAMB453_BREAST	3	BRCA
EFM19_BREAST	3	BRCA
BT474_BREAST	3	BRCA
MDAMB415_BREAST	3	BRCA
MDAMB134VI_BREAST	3	BRCA
HCC1500_BREAST	3	BRCA
BT483_BREAST	3	BRCA
HCC1428_BREAST	3	BRCA
ZR7530_BREAST	3	BRCA
SNUC2A_LARGE_INTESTINE	3	COAD/READ
SW837_LARGE_INTESTINE	3	COAD/READ
A704_KIDNEY	3	KIRC
CAL54_KIDNEY	3	KIRC
SNU449_LIVER	3	LIHC
LI7_LIVER	3	LIHC
JHH1_LIVER	3	LIHC
NCIH2087_LUNG	3	LUAD
NCIH1734_LUNG	3	LUAD
NCIH838_LUNG	3	LUAD
NCIH1437_LUNG	3	LUAD
NCIH1355_LUNG	3	LUAD
RERFLCAD1_LUNG	3	LUAD
ABC1_LUNG	3	LUAD
NCIH1781_LUNG	3	LUAD
HCC15_LUNG	3	LUSC
NCIH2170_LUNG	3	LUSC
NCIH1385_LUNG	3	LUSC
NCIH1869_LUNG	3	LUSC
D283MED_CENTRAL_NERVOUS_SYSTEM	3	MB
D341MED_CENTRAL_NERVOUS_SYSTEM	3	MB
NCIH28_PLEURA	3	MESO
ACCMESO1_PLEURA	3	MESO
NB1_AUTONOMIC_GANGLIA	3	NB
SNU119_OVARY	3	OV
CAOV4_OVARY	3	OV
KURAMOCHI_OVARY	3	OV
OVKATE_OVARY	3	OV
PANC0213_PANCREAS	3	PAAD
SNU410_PANCREAS	3	PAAD
TCCPAN2_PANCREAS	3	PAAD
NCIH660_PROSTATE	3	PRAD
DU145_PROSTATE	3	PRAD
22RV1_PROSTATE	3	PRAD
TE441T_SOFT_TISSUE	3	SARC
NCIH1694_LUNG	3	SCLC
NCIH2227_LUNG	3	SCLC
NCIH510_LUNG	3	SCLC
NCIH2066_LUNG	3	SCLC
NCIH1341_LUNG	3	SCLC
NCIH2029_LUNG	3	SCLC
NCIH1963_LUNG	3	SCLC
NCIH82_LUNG	3	SCLC
DMS273_LUNG	3	SCLC
CORL311_LUNG	3	SCLC
NCIH2081_LUNG	3	SCLC
NCIH1092_LUNG	3	SCLC
NCIH1105_LUNG	3	SCLC
CORL24_LUNG	3	SCLC
CORL88_LUNG	3	SCLC
NCIH1930_LUNG	3	SCLC
NCIH146_LUNG	3	SCLC
DMS79_LUNG	3	SCLC
NCIH526_LUNG	3	SCLC
NCIH446_LUNG	3	SCLC
SKMEL1_SKIN	3	SKCM
GSS_STOMACH	3	STAD
SNU668_STOMACH	3	STAD
NUGC2_STOMACH	3	STAD
HEC6_ENDOMETRIUM	3	UCEC
COLO684_ENDOMETRIUM	3	UCEC
JHUEM2_ENDOMETRIUM	3	UCEC
SUPT1_HAEMATOPOIETIC_AND_LYMPHOID_TISSUE	4	ALL	88
SUPB15_HAEMATOPOIETIC_AND_LYMPHOID_TISSUE	4	ALL
TALL1_HAEMATOPOIETIC_AND_LYMPHOID_TISSUE	4	ALL
PEER_HAEMATOPOIETIC_AND_LYMPHOID_TISSUE	4	ALL
LOUCY_HAEMATOPOIETIC_AND_LYMPHOID_TISSUE	4	ALL
SEM_HAEMATOPOIETIC_AND_LYMPHOID_TISSUE	4	ALL
NALM6_HAEMATOPOIETIC_AND_LYMPHOID_TISSUE	4	ALL
PF382_HAEMATOPOIETIC_AND_LYMPHOID_TISSUE	4	ALL
KE37_HAEMATOPOIETIC_AND_LYMPHOID_TISSUE	4	ALL
RPMI8402_HAEMATOPOIETIC_AND_LYMPHOID_TISSUE	4	ALL
P12ICHIKAWA_HAEMATOPOIETIC_AND_LYMPHOID_TISSUE	4	ALL
JURKAT_HAEMATOPOIETIC_AND_LYMPHOID_TISSUE	4	ALL
697_HAEMATOPOIETIC_AND_LYMPHOID_TISSUE	4	ALL
MHHCALL2_HAEMATOPOIETIC_AND_LYMPHOID_TISSUE	4	ALL
JVM3_HAEMATOPOIETIC_AND_LYMPHOID_TISSUE	4	CLL
JVM2_HAEMATOPOIETIC_AND_LYMPHOID_TISSUE	4	CLL
MEC1_HAEMATOPOIETIC_AND_LYMPHOID_TISSUE	4	CLL
P3HR1_HAEMATOPOIETIC_AND_LYMPHOID_TISSUE	4	DLBC
TOLEDO_HAEMATOPOIETIC_AND_LYMPHOID_TISSUE	4	DLBC
RAJI_HAEMATOPOIETIC_AND_LYMPHOID_TISSUE	4	DLBC
BL41_HAEMATOPOIETIC_AND_LYMPHOID_TISSUE	4	DLBC
A4FUK_HAEMATOPOIETIC_AND_LYMPHOID_TISSUE	4	DLBC
MC116_HAEMATOPOIETIC_AND_LYMPHOID_TISSUE	4	DLBC
CA46_HAEMATOPOIETIC_AND_LYMPHOID_TISSUE	4	DLBC
BCP1_HAEMATOPOIETIC_AND_LYMPHOID_TISSUE	4	DLBC
DB_HAEMATOPOIETIC_AND_LYMPHOID_TISSUE	4	DLBC
EB1_HAEMATOPOIETIC_AND_LYMPHOID_TISSUE	4	DLBC
DAUDI_HAEMATOPOIETIC_AND_LYMPHOID_TISSUE	4	DLBC
HT_HAEMATOPOIETIC_AND_LYMPHOID_TISSUE	4	DLBC
NAMALWA_HAEMATOPOIETIC_AND_LYMPHOID_TISSUE	4	DLBC
BL70_HAEMATOPOIETIC_AND_LYMPHOID_TISSUE	4	DLBC
RL_HAEMATOPOIETIC_AND_LYMPHOID_TISSUE	4	DLBC
GRANTA519_HAEMATOPOIETIC_AND_LYMPHOID_TISSUE	4	DLBC
SUDHL10_HAEMATOPOIETIC_AND_LYMPHOID_TISSUE	4	DLBC
SUDHL4_HAEMATOPOIETIC_AND_LYMPHOID_TISSUE	4	DLBC
MINO_HAEMATOPOIETIC_AND_LYMPHOID_TISSUE	4	DLBC
DOHH2_HAEMATOPOIETIC_AND_LYMPHOID_TISSUE	4	DLBC
KARPAS422_HAEMATOPOIETIC_AND_LYMPHOID_TISSUE	4	DLBC
PFEIFFER_HAEMATOPOIETIC_AND_LYMPHOID_TISSUE	4	DLBC
SUDHL6_HAEMATOPOIETIC_AND_LYMPHOID_TISSUE	4	DLBC
WSUDLCL2_HAEMATOPOIETIC_AND_LYMPHOID_TISSUE	4	DLBC
P31FUJ_HAEMATOPOIETIC_AND_LYMPHOID_TISSUE	4	LAML
HEL_HAEMATOPOIETIC_AND_LYMPHOID_TISSUE	4	LAML
HEL9217_HAEMATOPOIETIC_AND_LYMPHOID_TISSUE	4	LAML
THP1_HAEMATOPOIETIC_AND_LYMPHOID_TISSUE	4	LAML
GDM1_HAEMATOPOIETIC_AND_LYMPHOID_TISSUE	4	LAML
CMK_HAEMATOPOIETIC_AND_LYMPHOID_TISSUE	4	LAML
KG1_HAEMATOPOIETIC_AND_LYMPHOID_TISSUE	4	LAML
HL60_HAEMATOPOIETIC_AND_LYMPHOID_TISSUE	4	LAML
MONOMAC6_HAEMATOPOIETIC_AND_LYMPHOID_TISSUE	4	LAML
TF1_HAEMATOPOIETIC_AND_LYMPHOID_TISSUE	4	LAML
ME1_HAEMATOPOIETIC_AND_LYMPHOID_TISSUE	4	LAML
OCIAML5_HAEMATOPOIETIC_AND_LYMPHOID_TISSUE	4	LAML
M07E_HAEMATOPOIETIC_AND_LYMPHOID_TISSUE	4	LAML
NB4_HAEMATOPOIETIC_AND_LYMPHOID_TISSUE	4	LAML
OCIM1_HAEMATOPOIETIC_AND_LYMPHOID_TISSUE	4	LAML
SIGM5_HAEMATOPOIETIC_AND_LYMPHOID_TISSUE	4	LAML
F36P_HAEMATOPOIETIC_AND_LYMPHOID_TISSUE	4	LAML
NCO2_HAEMATOPOIETIC_AND_LYMPHOID_TISSUE	4	LCML
K562_HAEMATOPOIETIC_AND_LYMPHOID_TISSUE	4	LCML
KYO1_HAEMATOPOIETIC_AND_LYMPHOID_TISSUE	4	LCML
LAMA84_HAEMATOPOIETIC_AND_LYMPHOID_TISSUE	4	LCML
CMLT1_HAEMATOPOIETIC_AND_LYMPHOID_TISSUE	4	LCML
BV173_HAEMATOPOIETIC_AND_LYMPHOID_TISSUE	4	LCML
JURLMK1_HAEMATOPOIETIC_AND_LYMPHOID_TISSUE	4	LCML
KU812_HAEMATOPOIETIC_AND_LYMPHOID_TISSUE	4	LCML
EM2_HAEMATOPOIETIC_AND_LYMPHOID_TISSUE	4	LCML
HUNS1_HAEMATOPOIETIC_AND_LYMPHOID_TISSUE	4	MM
PCM6_HAEMATOPOIETIC_AND_LYMPHOID_TISSUE	4	MM
KMS18_HAEMATOPOIETIC_AND_LYMPHOID_TISSUE	4	MM
KMS21BM_HAEMATOPOIETIC_AND_LYMPHOID_TISSUE	4	MM
KMS27_HAEMATOPOIETIC_AND_LYMPHOID_TISSUE	4	MM
KMS28BM_HAEMATOPOIETIC_AND_LYMPHOID_TISSUE	4	MM
KMS34_HAEMATOPOIETIC_AND_LYMPHOID_TISSUE	4	MM
KHM1B_HAEMATOPOIETIC_AND_LYMPHOID_TISSUE	4	MM
KMM1_HAEMATOPOIETIC_AND_LYMPHOID_TISSUE	4	MM
KMS20_HAEMATOPOIETIC_AND_LYMPHOID_TISSUE	4	MM
NCIH929_HAEMATOPOIETIC_AND_LYMPHOID_TISSUE	4	MM
KMS12BM_HAEMATOPOIETIC_AND_LYMPHOID_TISSUE	4	MM
MM1S_HAEMATOPOIETIC_AND_LYMPHOID_TISSUE	4	MM
RPMI8226_HAEMATOPOIETIC_AND_LYMPHOID_TISSUE	4	MM
SKMM2_HAEMATOPOIETIC_AND_LYMPHOID_TISSUE	4	MM
LP1_HAEMATOPOIETIC_AND_LYMPHOID_TISSUE	4	MM
OPM2_HAEMATOPOIETIC_AND_LYMPHOID_TISSUE	4	MM
L363_HAEMATOPOIETIC_AND_LYMPHOID_TISSUE	4	MM
KARPAS620_HAEMATOPOIETIC_AND_LYMPHOID_TISSUE	4	MM
MOLP8_HAEMATOPOIETIC_AND_LYMPHOID_TISSUE	4	MM
SKNMC_BONE	4	SARC
UMUC3_URINARY_TRACT	5	BLCA	135
KMBC2_URINARY_TRACT	5	BLCA
SW780_URINARY_TRACT	5	BLCA
RT4_URINARY_TRACT	5	BLCA
RT112_URINARY_TRACT	5	BLCA
CAL29_URINARY_TRACT	5	BLCA
BFTC905_URINARY_TRACT	5	BLCA
MDAMB468_BREAST	5	BRCA
CAL851_BREAST	5	BRCA
HCC1806_BREAST	5	BRCA
CAL51_BREAST	5	BRCA
JIMT1_BREAST	5	BRCA
HUCCT1_BILIARY_TRACT	5	CHOL
SNU1196_BILIARY_TRACT	5	CHOL
SNU1079_BILIARY_TRACT	5	CHOL
SNU308_BILIARY_TRACT	5	CHOL
SNU245_BILIARY_TRACT	5	CHOL
NCIH508_LARGE_INTESTINE	5	COAD/READ
CW2_LARGE_INTESTINE	5	COAD/READ
SNU61_LARGE_INTESTINE	5	COAD/READ
SNUC5_LARGE_INTESTINE	5	COAD/READ
SNUC4_LARGE_INTESTINE	5	COAD/READ
SW1463_LARGE_INTESTINE	5	COAD/READ
HT55_LARGE_INTESTINE	5	COAD/READ
SNU81_LARGE_INTESTINE	5	COAD/READ
SNU1040_LARGE_INTESTINE	5	COAD/READ
SNU175_LARGE_INTESTINE	5	COAD/READ
SNU503_LARGE_INTESTINE	5	COAD/READ
RKO_LARGE_INTESTINE	5	COAD/READ
SNUC1_LARGE_INTESTINE	5	COAD/READ
LS180_LARGE_INTESTINE	5	COAD/READ
CL34_LARGE_INTESTINE	5	COAD/READ
KYSE450_OESOPHAGUS	5	ESCA
TE10_OESOPHAGUS	5	ESCA
TE6_OESOPHAGUS	5	ESCA
TE4_OESOPHAGUS	5	ESCA
ECGI10_OESOPHAGUS	5	ESCA
TE14_OESOPHAGUS	5	ESCA
KYSE180_OESOPHAGUS	5	ESCA
KYSE270_OESOPHAGUS	5	ESCA
TT_OESOPHAGUS	5	ESCA
TE15_OESOPHAGUS	5	ESCA
KYSE30_OESOPHAGUS	5	ESCA
KYSE150_OESOPHAGUS	5	ESCA
KG1C_CENTRAL_NERVOUS_SYSTEM	5	GBM
GB1_CENTRAL_NERVOUS_SYSTEM	5	GBM
T98G_CENTRAL_NERVOUS_SYSTEM	5	GBM
U251MG_CENTRAL_NERVOUS_SYSTEM	5	GBM
U87MG_CENTRAL_NERVOUS_SYSTEM	5	GBM
SNU1214_UPPER_AERODIGESTIVE_TRACT	5	HNSC
A253_SALIVARY_GLAND	5	HNSC
SNU1076_UPPER_AERODIGESTIVE_TRACT	5	HNSC
SNU899_UPPER_AERODIGESTIVE_TRACT	5	HNSC
TUHR4TKB_KIDNEY	5	KIRC
RCC10RGB_KIDNEY	5	KIRC
SNU1272_KIDNEY	5	KIRC
TUHR14TKB_KIDNEY	5	KIRC
TUHR10TKB_KIDNEY	5	KIRC
SNU349_KIDNEY	5	KIRC
CAKI2_KIDNEY	5	KIRC
NMCG1_CENTRAL_NERVOUS_SYSTEM	5	LGG
SNU886_LIVER	5	LIHC
RERFLCAD2_LUNG	5	LUAD
NCIH1651_LUNG	5	LUAD
NCIH1666_LUNG	5	LUAD
NCIH322_LUNG	5	LUAD
NCIH2291_LUNG	5	LUAD
MORCPR_LUNG	5	LUAD
NCIH358_LUNG	5	LUAD
NCIH1793_LUNG	5	LUAD
NCIH596_LUNG	5	LUAD
NCIH854_LUNG	5	LUAD
DV90_LUNG	5	LUAD
RERFLCKJ_LUNG	5	LUAD
NCIH441_LUNG	5	LUAD
A549_LUNG	5	LUAD
NCIH647_LUNG	5	LUAD
HCC78_LUNG	5	LUAD
NCIH2009_LUNG	5	LUAD
HCC95_LUNG	5	LUSC
LC1F_LUNG	5	LUSC
CALU1_LUNG	5	LUSC
NCIH2452_PLEURA	5	MESO
OV56_OVARY	5	OV
JHOS4_OVARY	5	OV
JHOM1_OVARY	5	OV
JHOC5_OVARY	5	OV
JHOM2B_OVARY	5	OV
NIHOVCAR3_OVARY	5	OV
OVCAR8_OVARY	5	OV
59M_OVARY	5	OV
SNU840_OVARY	5	OV
OC314_OVARY	5	OV
MCAS_OVARY	5	OV
OVSAHO_OVARY	5	OV
SNU213_PANCREAS	5	PAAD
HPAFII_PANCREAS	5	PAAD
BXPC3_PANCREAS	5	PAAD
T3M4_PANCREAS	5	PAAD
PK45H_PANCREAS	5	PAAD
PK1_PANCREAS	5	PAAD
ASPC1_PANCREAS	5	PAAD
L33_PANCREAS	5	PAAD
PSN1_PANCREAS	5	PAAD
SKUT1_SOFT_TISSUE	5	SARC
GCT_SOFT_TISSUE	5	SARC
U2OS_BONE	5	SARC
MG63_BONE	5	SARC
NCIH1339_LUNG	5	SCLC
CJM_SKIN	5	SKCM
LMSU_STOMACH	5	STAD
ECC10_STOMACH	5	STAD
TGBC11TKB_STOMACH	5	STAD
SNU520_STOMACH	5	STAD
SNU620_STOMACH	5	STAD
GSU_STOMACH	5	STAD
MKN1_STOMACH	5	STAD
HUG1N_STOMACH	5	STAD
SNU16_STOMACH	5	STAD
NCIN87_STOMACH	5	STAD
OCUM1_STOMACH	5	STAD
SNU5_STOMACH	5	STAD
SNU601_STOMACH	5	STAD
NCCSTCK140_STOMACH	5	STAD
SNU719_STOMACH	5	STAD
KATOIII_STOMACH	5	STAD
IM95_STOMACH	5	STAD
MKN45_STOMACH	5	STAD
SNGM_ENDOMETRIUM	5	UCEC
SNU1077_ENDOMETRIUM	5	UCEC
JHUEM3_ENDOMETRIUM	5	UCEC
RL952_ENDOMETRIUM	5	UCEC
EFE184_ENDOMETRIUM	5	UCEC
TEN_ENDOMETRIUM	5	UCEC
JHUEM1_ENDOMETRIUM	5	UCEC
UMUC1_URINARY_TRACT	6	BLCA	58
JMSU1_URINARY_TRACT	6	BLCA
MDAMB175VII_BREAST	6	BRCA
MDAMB231_BREAST	6	BRCA
AU565_BREAST	6	BRCA
BT20_BREAST	6	BRCA
LS513_LARGE_INTESTINE	6	COAD/READ
MDST8_LARGE_INTESTINE	6	COAD/READ
HCC56_LARGE_INTESTINE	6	COAD/READ
HCT116_LARGE_INTESTINE	6	COAD/READ
SW1417_LARGE_INTESTINE	6	COAD/READ
KYSE520_OESOPHAGUS	6	ESCA
CAS1_CENTRAL_NERVOUS_SYSTEM	6	GBM
SNU489_CENTRAL_NERVOUS_SYSTEM	6	GBM
SNU201_CENTRAL_NERVOUS_SYSTEM	6	GBM
SNU466_CENTRAL_NERVOUS_SYSTEM	6	GBM
SNU1105_CENTRAL_NERVOUS_SYSTEM	6	GBM
SNU626_CENTRAL_NERVOUS_SYSTEM	6	GBM
LN18_CENTRAL_NERVOUS_SYSTEM	6	GBM
BICR56_UPPER_AERODIGESTIVE_TRACT	6	HNSC
BICR16_UPPER_AERODIGESTIVE_TRACT	6	HNSC
BICR22_UPPER_AERODIGESTIVE_TRACT	6	HNSC
YD15_SALIVARY_GLAND	6	HNSC
YD10B_UPPER_AERODIGESTIVE_TRACT	6	HNSC
CAL27_UPPER_AERODIGESTIVE_TRACT	6	HNSC
PECAPJ15_UPPER_AERODIGESTIVE_TRACT	6	HNSC
CAL33_UPPER_AERODIGESTIVE_TRACT	6	HNSC
YD38_UPPER_AERODIGESTIVE_TRACT	6	HNSC
SNU46_UPPER_AERODIGESTIVE_TRACT	6	HNSC
YD8_UPPER_AERODIGESTIVE_TRACT	6	HNSC
VMRCRCW_KIDNEY	6	KIRC
VMRCRCZ_KIDNEY	6	KIRC
SW1783_CENTRAL_NERVOUS_SYSTEM	6	LGG
H4_CENTRAL_NERVOUS_SYSTEM	6	LGG
HLF_LIVER	6	LIHC
JHH2_LIVER	6	LIHC
NCIH2347_LUNG	6	LUAD
NCIH1573_LUNG	6	LUAD
NCIH1944_LUNG	6	LUAD
SW900_LUNG	6	LUSC
NCIH2052_PLEURA	6	MESO
ISTMES2_PLEURA	6	MESO
OV90_OVARY	6	OV
OVMANA_OVARY	6	OV
CAPAN2_PANCREAS	6	PAAD
HS766T_PANCREAS	6	PAAD
PANC0403_PANCREAS	6	PAAD
HOS_BONE	6	SARC
NCIH2286_LUNG	6	SCLC
MDAMB435S_SKIN	6	SKCM
LOXIMVI_SKIN	6	SKCM
GCIY_STOMACH	6	STAD
KE39_STOMACH	6	STAD
NUGC4_STOMACH	6	STAD
SW579_THYROID	6	THCA
HEC50B_ENDOMETRIUM	6	UCEC
HEC251_ENDOMETRIUM	6	UCEC
ISHIKAWAHERAKLIO02ER_ENDOMETRIUM	6	UCEC
RS411_HAEMATOPOIETIC_AND_LYMPHOID_TISSUE	7	ALL	75
ALLSIL_HAEMATOPOIETIC_AND_LYMPHOID_TISSUE	7	ALL
MHHCALL3_HAEMATOPOIETIC_AND_LYMPHOID_TISSUE	7	ALL
KOPN8_HAEMATOPOIETIC_AND_LYMPHOID_TISSUE	7	ALL
MOLT3_HAEMATOPOIETIC_AND_LYMPHOID_TISSUE	7	ALL
UBLC1_URINARY_TRACT	7	BLCA
T24_URINARY_TRACT	7	BLCA
253J_URINARY_TRACT	7	BLCA
253JBV_URINARY_TRACT	7	BLCA
SCABER_URINARY_TRACT	7	BLCA
MDAMB436_BREAST	7	BRCA
HCC1395_BREAST	7	BRCA
SNU869_BILIARY_TRACT	7	CHOL
SNU1197_LARGE_INTESTINE	7	COAD/READ
SNU1033_LARGE_INTESTINE	7	COAD/READ
GP2D_LARGE_INTESTINE	7	COAD/READ
SKCO1_LARGE_INTESTINE	7	COAD/READ
SNU283_LARGE_INTESTINE	7	COAD/READ
LS411N_LARGE_INTESTINE	7	COAD/READ
SW403_LARGE_INTESTINE	7	COAD/READ
A3KAW_HAEMATOPOIETIC_AND_LYMPHOID_TISSUE	7	DLBC
TE5_OESOPHAGUS	7	ESCA
OE19_OESOPHAGUS	7	ESCA
OE21_OESOPHAGUS	7	ESCA
BECKER_CENTRAL_NERVOUS_SYSTEM	7	GBM
SF268_CENTRAL_NERVOUS_SYSTEM	7	GBM
SNB75_CENTRAL_NERVOUS_SYSTEM	7	GBM
SNU1066_UPPER_AERODIGESTIVE_TRACT	7	HNSC
SNU1041_UPPER_AERODIGESTIVE_TRACT	7	HNSC
SCC25_UPPER_AERODIGESTIVE_TRACT	7	HNSC
OSRC2_KIDNEY	7	KIRC
UO31_KIDNEY	7	KIRC
AML193_HAEMATOPOIETIC_AND_LYMPHOID_TISSUE	7	LAML
PL21_HAEMATOPOIETIC_AND_LYMPHOID_TISSUE	7	LAML
GAMG_CENTRAL_NERVOUS_SYSTEM	7	LGG
SF539_CENTRAL_NERVOUS_SYSTEM	7	LGG
SNU878_LIVER	7	LIHC
NCIH684_LIVER	7	LIHC
HUH1_LIVER	7	LIHC
NCIH2228_LUNG	7	LUAD
PC14_LUNG	7	LUAD
NCIH1650_LUNG	7	LUAD
HCC2108_LUNG	7	LUAD
NCIH650_LUNG	7	LUAD
HCC1833_LUNG	7	LUAD
NCIH2030_LUNG	7	LUAD
NCIH1975_LUNG	7	LUAD
NCIH2405_LUNG	7	LUAD
HOP62_LUNG	7	LUAD
EKVX_LUNG	7	LUAD
HCC1588_LUNG	7	LUSC
NCIH520_LUNG	7	LUSC
LOUNH91_LUNG	7	LUSC
LK2_LUNG	7	LUSC
KE97_HAEMATOPOIETIC_AND_LYMPHOID_TISSUE	7	MM
U266B1_HAEMATOPOIETIC_AND_LYMPHOID_TISSUE	7	MM
JJN3_HAEMATOPOIETIC_AND_LYMPHOID_TISSUE	7	MM
SNU8_OVARY	7	OV
ES2_OVARY	7	OV
OVCAR5_OVARY	7	OV
PATU8988S_PANCREAS	7	PAAD
PANC1_PANCREAS	7	PAAD
PANC1005_PANCREAS	7	PAAD
RKN_SOFT_TISSUE	7	SARC
RD_SOFT_TISSUE	7	SARC
MHHES1_BONE	7	SARC
RH18_SOFT_TISSUE	7	SARC
NCIH1836_LUNG	7	SCLC
NCIH889_LUNG	7	SCLC
RPMI7951_SKIN	7	SKCM
WM983B_SKIN	7	SKCM
WM2664_SKIN	7	SKCM
HS852T_SKIN	7	SKCM
FTC238_THYROID	7	THCA
MFE296_ENDOMETRIUM	7	UCEC
LS123_LARGE_INTESTINE	8	COAD/READ	34
COLO699_LUNG	8	LUAD
RVH421_SKIN	8	SKCM
HS936T_SKIN	8	SKCM
SKMEL28_SKIN	8	SKCM
SH4_SKIN	8	SKCM
COLO800_SKIN	8	SKCM
UACC62_SKIN	8	SKCM
COLO783_SKIN	8	SKCM
COLO792_SKIN	8	SKCM
WM1799_SKIN	8	SKCM
MEWO_SKIN	8	SKCM
WM88_SKIN	8	SKCM
SKMEL31_SKIN	8	SKCM
HS939T_SKIN	8	SKCM
A101D_SKIN	8	SKCM
COLO829_SKIN	8	SKCM
SKMEL24_SKIN	8	SKCM
K029AX_SKIN	8	SKCM
SKMEL3_SKIN	8	SKCM
HMCB_SKIN	8	SKCM
MALME3M_SKIN	8	SKCM
MELJUSO_SKIN	8	SKCM
SKMEL2_SKIN	8	SKCM
COLO679_SKIN	8	SKCM
MELHO_SKIN	8	SKCM
G361_SKIN	8	SKCM
COLO741_SKIN	8	SKCM
SKMEL30_SKIN	8	SKCM
C32_SKIN	8	SKCM
SKMEL5_SKIN	8	SKCM
HS944T_SKIN	8	SKCM
UACC257_SKIN	8	SKCM
IGR37_SKIN	8	SKCM
HH_HAEMATOPOIETIC_AND_LYMPHOID_TISSUE	9	ALL	66
REH_HAEMATOPOIETIC_AND_LYMPHOID_TISSUE	9	ALL
BDCM_HAEMATOPOIETIC_AND_LYMPHOID_TISSUE	9	ALL
MOLT13_HAEMATOPOIETIC_AND_LYMPHOID_TISSUE	9	ALL
KASUMI2_HAEMATOPOIETIC_AND_LYMPHOID_TISSUE	9	ALL
DND41_HAEMATOPOIETIC_AND_LYMPHOID_TISSUE	9	ALL
NALM19_HAEMATOPOIETIC_AND_LYMPHOID_TISSUE	9	ALL
HPBALL_HAEMATOPOIETIC_AND_LYMPHOID_TISSUE	9	ALL
MHHCALL4_HAEMATOPOIETIC_AND_LYMPHOID_TISSUE	9	ALL
MUTZ5_HAEMATOPOIETIC_AND_LYMPHOID_TISSUE	9	ALL
MOLT16_HAEMATOPOIETIC_AND_LYMPHOID_TISSUE	9	ALL
RCHACV_HAEMATOPOIETIC_AND_LYMPHOID_TISSUE	9	ALL
HCC1569_BREAST	9	BRCA
HCC70_BREAST	9	BRCA
UACC812_BREAST	9	BRCA
EHEB_HAEMATOPOIETIC_AND_LYMPHOID_TISSUE	9	CLL
SW480_LARGE_INTESTINE	9	COAD/READ
GA10_HAEMATOPOIETIC_AND_LYMPHOID_TISSUE	9	DLBC
JM1_HAEMATOPOIETIC_AND_LYMPHOID_TISSUE	9	DLBC
SUDHL8_HAEMATOPOIETIC_AND_LYMPHOID_TISSUE	9	DLBC
OCILY3_HAEMATOPOIETIC_AND_LYMPHOID_TISSUE	9	DLBC
CI1_HAEMATOPOIETIC_AND_LYMPHOID_TISSUE	9	DLBC
U937_HAEMATOPOIETIC_AND_LYMPHOID_TISSUE	9	DLBC
ST486_HAEMATOPOIETIC_AND_LYMPHOID_TISSUE	9	DLBC
JEKO1_HAEMATOPOIETIC_AND_LYMPHOID_TISSUE	9	DLBC
NUDHL1_HAEMATOPOIETIC_AND_LYMPHOID_TISSUE	9	DLBC
OCILY19_HAEMATOPOIETIC_AND_LYMPHOID_TISSUE	9	DLBC
RI1_HAEMATOPOIETIC_AND_LYMPHOID_TISSUE	9	DLBC
NUDUL1_HAEMATOPOIETIC_AND_LYMPHOID_TISSUE	9	DLBC
REC1_HAEMATOPOIETIC_AND_LYMPHOID_TISSUE	9	DLBC
SUDHL5_HAEMATOPOIETIC_AND_LYMPHOID_TISSUE	9	DLBC
TE1_OESOPHAGUS	9	ESCA
HSC3_UPPER_AERODIGESTIVE_TRACT	9	HNSC
KMRC20_KIDNEY	9	KIRC
KO52_HAEMATOPOIETIC_AND_LYMPHOID_TISSUE	9	LAML
SKM1_HAEMATOPOIETIC_AND_LYMPHOID_TISSUE	9	LAML
MV411_HAEMATOPOIETIC_AND_LYMPHOID_TISSUE	9	LAML
MOLM13_HAEMATOPOIETIC_AND_LYMPHOID_TISSUE	9	LAML
OCIAML3_HAEMATOPOIETIC_AND_LYMPHOID_TISSUE	9	LAML
KASUMI6_HAEMATOPOIETIC_AND_LYMPHOID_TISSUE	9	LAML
EOL1_HAEMATOPOIETIC_AND_LYMPHOID_TISSUE	9	LAML
MONOMAC1_HAEMATOPOIETIC_AND_LYMPHOID_TISSUE	9	LAML
OCIAML2_HAEMATOPOIETIC_AND_LYMPHOID_TISSUE	9	LAML
NOMO1_HAEMATOPOIETIC_AND_LYMPHOID_TISSUE	9	LAML
MEG01_HAEMATOPOIETIC_AND_LYMPHOID_TISSUE	9	LCML
MOLM6_HAEMATOPOIETIC_AND_LYMPHOID_TISSUE	9	LCML
NALM1_HAEMATOPOIETIC_AND_LYMPHOID_TISSUE	9	LCML
JK1_HAEMATOPOIETIC_AND_LYMPHOID_TISSUE	9	LCML
KCL22_HAEMATOPOIETIC_AND_LYMPHOID_TISSUE	9	LCML
SNU398_LIVER	9	LIHC
NCIH1792_LUNG	9	LUAD
NCIH2126_LUNG	9	LUAD
KMS26_HAEMATOPOIETIC_AND_LYMPHOID_TISSUE	9	MM
KMS11_HAEMATOPOIETIC_AND_LYMPHOID_TISSUE	9	MM
MOLP2_HAEMATOPOIETIC_AND_LYMPHOID_TISSUE	9	MM
EJM_HAEMATOPOIETIC_AND_LYMPHOID_TISSUE	9	MM
AMO1_HAEMATOPOIETIC_AND_LYMPHOID_TISSUE	9	MM
A2780_OVARY	9	OV
PC3_PROSTATE	9	PRAD
G401_SOFT_TISSUE	9	SARC
NCIH1184_LUNG	9	SCLC
NCIH1048_LUNG	9	SCLC
IPC298_SKIN	9	SKCM
A375_SKIN	9	SKCM
SNU1_STOMACH	9	STAD
HEC108_ENDOMETRIUM	9	UCEC
KU1919_URINARY_TRACT	10	BLCA	67
HS578T_BREAST	10	BRCA
SNU478_BILIARY_TRACT	10	CHOL
TE8_OESOPHAGUS	10	ESCA
COLO680N_OESOPHAGUS	10	ESCA
SF126_CENTRAL_NERVOUS_SYSTEM	10	GBM
M059K_CENTRAL_NERVOUS_SYSTEM	10	GBM
YH13_CENTRAL_NERVOUS_SYSTEM	10	GBM
DKMG_CENTRAL_NERVOUS_SYSTEM	10	GBM
CCFSTTG1_CENTRAL_NERVOUS_SYSTEM	10	GBM
SW1088_CENTRAL_NERVOUS_SYSTEM	10	GBM
DBTRG05MG_CENTRAL_NERVOUS_SYSTEM	10	GBM
42MGBA_CENTRAL_NERVOUS_SYSTEM	10	GBM
KS1_CENTRAL_NERVOUS_SYSTEM	10	GBM
SCC4_UPPER_AERODIGESTIVE_TRACT	10	HNSC
ACHN_KIDNEY	10	KIRC
KALS1_CENTRAL_NERVOUS_SYSTEM	10	LGG
KNS42_CENTRAL_NERVOUS_SYSTEM	10	LGG
HS683_CENTRAL_NERVOUS_SYSTEM	10	LGG
JHH4_LIVER	10	LIHC
JHH5_LIVER	10	LIHC
HS618T_FIBROBLAST	10	LUAD
HS229T_FIBROBLAST	10	LUAD
HCC4006_LUNG	10	LUAD
RERFLCAI_LUNG	10	LUSC
SKMES1_LUNG	10	LUSC
ONS76_CENTRAL_NERVOUS_SYSTEM	10	MB
MSTO211H_PLEURA	10	MESO
NH6_AUTONOMIC_GANGLIA	10	NB
KPNRTBM1_AUTONOMIC_GANGLIA	10	NB
SKNFI_AUTONOMIC_GANGLIA	10	NB
SKNAS_AUTONOMIC_GANGLIA	10	NB
IMR32_AUTONOMIC_GANGLIA	10	NB
KPNYN_AUTONOMIC_GANGLIA	10	NB
SKNBE2_AUTONOMIC_GANGLIA	10	NB
SKNDZ_AUTONOMIC_GANGLIA	10	NB
KELLY_AUTONOMIC_GANGLIA	10	NB
MHHNB11_AUTONOMIC_GANGLIA	10	NB
CHP126_AUTONOMIC_GANGLIA	10	NB
SIMA_AUTONOMIC_GANGLIA	10	NB
OAW28_OVARY	10	OV
CAOV3_OVARY	10	OV
QGP1_PANCREAS	10	PAAD
OUMS27_BONE	10	SARC
A204_SOFT_TISSUE	10	SARC
RH30_SOFT_TISSUE	10	SARC
KYM1_SOFT_TISSUE	10	SARC
HS819T_FIBROBLAST	10	SARC
G402_SOFT_TISSUE	10	SARC
TE125T_FIBROBLAST	10	SARC
RH41_SOFT_TISSUE	10	SARC
CAL78_BONE	10	SARC
CADOES1_BONE	10	SARC
HCC33_LUNG	10	SCLC
NCIH1436_LUNG	10	SCLC
NCIH1876_LUNG	10	SCLC
CORL279_LUNG	10	SCLC
DMS153_LUNG	10	SCLC
NCIH1618_LUNG	10	SCLC
NCIH69_LUNG	10	SCLC
NCIH524_LUNG	10	SCLC
NCIH209_LUNG	10	SCLC
NCIH2171_LUNG	10	SCLC
SCLC21H_LUNG	10	SCLC
SHP77_LUNG	10	SCLC
ECC12_STOMACH	10	STAD
SNU685_ENDOMETRIUM	10	UCEC
