# Supplementary material for: Exploring the classification of cancer cell lines from multiple omic views
Source: PeerJ. 2020 Aug 18;8:e9440. doi: 10.7717/peerj.9440 (PMC7441922; doi:10.7717/peerj.9440)
Supplement: Table S4 [file peerj-08-9440-s009.xlsx]

## Sheet: Sheet1
Table S4： METHY cluster membership.
Cell lines	cluster	TCGA disease	Number of cell lines
COLO320_LARGE_INTESTINE	1	COAD/READ	48
HCC1833_LUNG	1	LUAD
NCIH1395_LUNG	1	LUAD
NH6_AUTONOMIC_GANGLIA	1	NB
HPAFII_PANCREAS	1	PAAD
QGP1_PANCREAS	1	PAAD
NCIH660_PROSTATE	1	PRAD
VCAP_PROSTATE	1	PRAD
MDAPCA2B_PROSTATE	1	PRAD
22RV1_PROSTATE	1	PRAD
PC3_PROSTATE	1	PRAD
DMS53_LUNG	1	SCLC
NCIH1184_LUNG	1	SCLC
NCIH510_LUNG	1	SCLC
NCIH2066_LUNG	1	SCLC
NCIH1341_LUNG	1	SCLC
NCIH2029_LUNG	1	SCLC
HCC33_LUNG	1	SCLC
COLO668_LUNG	1	SCLC
NCIH1963_LUNG	1	SCLC
DMS454_LUNG	1	SCLC
CORL47_LUNG	1	SCLC
DMS273_LUNG	1	SCLC
CORL311_LUNG	1	SCLC
NCIH1092_LUNG	1	SCLC
NCIH1436_LUNG	1	SCLC
NCIH1876_LUNG	1	SCLC
CORL24_LUNG	1	SCLC
CORL88_LUNG	1	SCLC
CORL95_LUNG	1	SCLC
CORL279_LUNG	1	SCLC
DMS153_LUNG	1	SCLC
NCIH1618_LUNG	1	SCLC
NCIH69_LUNG	1	SCLC
NCIH1930_LUNG	1	SCLC
NCIH1836_LUNG	1	SCLC
NCIH209_LUNG	1	SCLC
NCIH889_LUNG	1	SCLC
NCIH211_LUNG	1	SCLC
NCIH2171_LUNG	1	SCLC
NCIH146_LUNG	1	SCLC
DMS79_LUNG	1	SCLC
NCIH526_LUNG	1	SCLC
SCLC21H_LUNG	1	SCLC
SHP77_LUNG	1	SCLC
ECC10_STOMACH	1	STAD
ECC12_STOMACH	1	STAD
TT_THYROID	1	THCA
DU4475_BREAST	2	BRCA	82
HUCCT1_BILIARY_TRACT	2	CHOL
SNU1196_BILIARY_TRACT	2	CHOL
SNU869_BILIARY_TRACT	2	CHOL
SW1116_LARGE_INTESTINE	2	COAD/READ
NCIH716_LARGE_INTESTINE	2	COAD/READ
SW480_LARGE_INTESTINE	2	COAD/READ
SNUC2A_LARGE_INTESTINE	2	COAD/READ
NCIH508_LARGE_INTESTINE	2	COAD/READ
LS123_LARGE_INTESTINE	2	COAD/READ
SNU1197_LARGE_INTESTINE	2	COAD/READ
CW2_LARGE_INTESTINE	2	COAD/READ
SNU61_LARGE_INTESTINE	2	COAD/READ
HT115_LARGE_INTESTINE	2	COAD/READ
SNUC5_LARGE_INTESTINE	2	COAD/READ
SNUC4_LARGE_INTESTINE	2	COAD/READ
HCT15_LARGE_INTESTINE	2	COAD/READ
SW1463_LARGE_INTESTINE	2	COAD/READ
CCK81_LARGE_INTESTINE	2	COAD/READ
COLO201_LARGE_INTESTINE	2	COAD/READ
C2BBE1_LARGE_INTESTINE	2	COAD/READ
LS513_LARGE_INTESTINE	2	COAD/READ
SW837_LARGE_INTESTINE	2	COAD/READ
GP2D_LARGE_INTESTINE	2	COAD/READ
SKCO1_LARGE_INTESTINE	2	COAD/READ
SNU81_LARGE_INTESTINE	2	COAD/READ
SNU1040_LARGE_INTESTINE	2	COAD/READ
SNU175_LARGE_INTESTINE	2	COAD/READ
SNU407_LARGE_INTESTINE	2	COAD/READ
SNU283_LARGE_INTESTINE	2	COAD/READ
HCC56_LARGE_INTESTINE	2	COAD/READ
RCM1_LARGE_INTESTINE	2	COAD/READ
SNUC1_LARGE_INTESTINE	2	COAD/READ
SW620_LARGE_INTESTINE	2	COAD/READ
HCT116_LARGE_INTESTINE	2	COAD/READ
LS411N_LARGE_INTESTINE	2	COAD/READ
LOVO_LARGE_INTESTINE	2	COAD/READ
SW48_LARGE_INTESTINE	2	COAD/READ
LS180_LARGE_INTESTINE	2	COAD/READ
SW403_LARGE_INTESTINE	2	COAD/READ
NCIH747_LARGE_INTESTINE	2	COAD/READ
SW1417_LARGE_INTESTINE	2	COAD/READ
SW948_LARGE_INTESTINE	2	COAD/READ
T84_LARGE_INTESTINE	2	COAD/READ
CL14_LARGE_INTESTINE	2	COAD/READ
CL40_LARGE_INTESTINE	2	COAD/READ
COLO678_LARGE_INTESTINE	2	COAD/READ
CL11_LARGE_INTESTINE	2	COAD/READ
CL34_LARGE_INTESTINE	2	COAD/READ
OE33_OESOPHAGUS	2	ESCA
CALU6_LUNG	2	LUAD
NCIH854_LUNG	2	LUAD
DV90_LUNG	2	LUAD
OV90_OVARY	2	OV
MCAS_OVARY	2	OV
PATU8988S_PANCREAS	2	PAAD
HPAC_PANCREAS	2	PAAD
PATU8902_PANCREAS	2	PAAD
HUPT3_PANCREAS	2	PAAD
BXPC3_PANCREAS	2	PAAD
SUIT2_PANCREAS	2	PAAD
PANC0813_PANCREAS	2	PAAD
HS766T_PANCREAS	2	PAAD
ASPC1_PANCREAS	2	PAAD
PANC0403_PANCREAS	2	PAAD
PK59_PANCREAS	2	PAAD
PSN1_PANCREAS	2	PAAD
PATU8988T_PANCREAS	2	PAAD
TGBC11TKB_STOMACH	2	STAD
SNU520_STOMACH	2	STAD
SNU620_STOMACH	2	STAD
GSU_STOMACH	2	STAD
MKN74_STOMACH	2	STAD
NCIN87_STOMACH	2	STAD
OCUM1_STOMACH	2	STAD
SNU5_STOMACH	2	STAD
SNU601_STOMACH	2	STAD
SNU719_STOMACH	2	STAD
SNU216_STOMACH	2	STAD
AGS_STOMACH	2	STAD
NUGC3_STOMACH	2	STAD
2313287_STOMACH	2	STAD
HH_HAEMATOPOIETIC_AND_LYMPHOID_TISSUE	3	ALL	58
BDCM_HAEMATOPOIETIC_AND_LYMPHOID_TISSUE	3	ALL
EHEB_HAEMATOPOIETIC_AND_LYMPHOID_TISSUE	3	CLL
JVM2_HAEMATOPOIETIC_AND_LYMPHOID_TISSUE	3	CLL
P3HR1_HAEMATOPOIETIC_AND_LYMPHOID_TISSUE	3	DLBC
TOLEDO_HAEMATOPOIETIC_AND_LYMPHOID_TISSUE	3	DLBC
RAJI_HAEMATOPOIETIC_AND_LYMPHOID_TISSUE	3	DLBC
BL41_HAEMATOPOIETIC_AND_LYMPHOID_TISSUE	3	DLBC
A4FUK_HAEMATOPOIETIC_AND_LYMPHOID_TISSUE	3	DLBC
A3KAW_HAEMATOPOIETIC_AND_LYMPHOID_TISSUE	3	DLBC
CA46_HAEMATOPOIETIC_AND_LYMPHOID_TISSUE	3	DLBC
BCP1_HAEMATOPOIETIC_AND_LYMPHOID_TISSUE	3	DLBC
DB_HAEMATOPOIETIC_AND_LYMPHOID_TISSUE	3	DLBC
GA10_HAEMATOPOIETIC_AND_LYMPHOID_TISSUE	3	DLBC
EB1_HAEMATOPOIETIC_AND_LYMPHOID_TISSUE	3	DLBC
DAUDI_HAEMATOPOIETIC_AND_LYMPHOID_TISSUE	3	DLBC
HT_HAEMATOPOIETIC_AND_LYMPHOID_TISSUE	3	DLBC
JM1_HAEMATOPOIETIC_AND_LYMPHOID_TISSUE	3	DLBC
NAMALWA_HAEMATOPOIETIC_AND_LYMPHOID_TISSUE	3	DLBC
SUDHL8_HAEMATOPOIETIC_AND_LYMPHOID_TISSUE	3	DLBC
OCILY3_HAEMATOPOIETIC_AND_LYMPHOID_TISSUE	3	DLBC
BL70_HAEMATOPOIETIC_AND_LYMPHOID_TISSUE	3	DLBC
CI1_HAEMATOPOIETIC_AND_LYMPHOID_TISSUE	3	DLBC
ST486_HAEMATOPOIETIC_AND_LYMPHOID_TISSUE	3	DLBC
RL_HAEMATOPOIETIC_AND_LYMPHOID_TISSUE	3	DLBC
JEKO1_HAEMATOPOIETIC_AND_LYMPHOID_TISSUE	3	DLBC
NUDHL1_HAEMATOPOIETIC_AND_LYMPHOID_TISSUE	3	DLBC
SUDHL10_HAEMATOPOIETIC_AND_LYMPHOID_TISSUE	3	DLBC
SUDHL4_HAEMATOPOIETIC_AND_LYMPHOID_TISSUE	3	DLBC
OCILY19_HAEMATOPOIETIC_AND_LYMPHOID_TISSUE	3	DLBC
DOHH2_HAEMATOPOIETIC_AND_LYMPHOID_TISSUE	3	DLBC
RI1_HAEMATOPOIETIC_AND_LYMPHOID_TISSUE	3	DLBC
KARPAS422_HAEMATOPOIETIC_AND_LYMPHOID_TISSUE	3	DLBC
PFEIFFER_HAEMATOPOIETIC_AND_LYMPHOID_TISSUE	3	DLBC
NUDUL1_HAEMATOPOIETIC_AND_LYMPHOID_TISSUE	3	DLBC
SUDHL6_HAEMATOPOIETIC_AND_LYMPHOID_TISSUE	3	DLBC
REC1_HAEMATOPOIETIC_AND_LYMPHOID_TISSUE	3	DLBC
SUDHL5_HAEMATOPOIETIC_AND_LYMPHOID_TISSUE	3	DLBC
WSUDLCL2_HAEMATOPOIETIC_AND_LYMPHOID_TISSUE	3	DLBC
PCM6_HAEMATOPOIETIC_AND_LYMPHOID_TISSUE	3	MM
KMS21BM_HAEMATOPOIETIC_AND_LYMPHOID_TISSUE	3	MM
KMS27_HAEMATOPOIETIC_AND_LYMPHOID_TISSUE	3	MM
KMS28BM_HAEMATOPOIETIC_AND_LYMPHOID_TISSUE	3	MM
KHM1B_HAEMATOPOIETIC_AND_LYMPHOID_TISSUE	3	MM
KMS11_HAEMATOPOIETIC_AND_LYMPHOID_TISSUE	3	MM
U266B1_HAEMATOPOIETIC_AND_LYMPHOID_TISSUE	3	MM
KMM1_HAEMATOPOIETIC_AND_LYMPHOID_TISSUE	3	MM
NCIH929_HAEMATOPOIETIC_AND_LYMPHOID_TISSUE	3	MM
MM1S_HAEMATOPOIETIC_AND_LYMPHOID_TISSUE	3	MM
RPMI8226_HAEMATOPOIETIC_AND_LYMPHOID_TISSUE	3	MM
MOLP2_HAEMATOPOIETIC_AND_LYMPHOID_TISSUE	3	MM
SKMM2_HAEMATOPOIETIC_AND_LYMPHOID_TISSUE	3	MM
LP1_HAEMATOPOIETIC_AND_LYMPHOID_TISSUE	3	MM
OPM2_HAEMATOPOIETIC_AND_LYMPHOID_TISSUE	3	MM
L363_HAEMATOPOIETIC_AND_LYMPHOID_TISSUE	3	MM
EJM_HAEMATOPOIETIC_AND_LYMPHOID_TISSUE	3	MM
AMO1_HAEMATOPOIETIC_AND_LYMPHOID_TISSUE	3	MM
MOLP8_HAEMATOPOIETIC_AND_LYMPHOID_TISSUE	3	MM
UMUC3_URINARY_TRACT	4	BLCA	56
TCCSUP_URINARY_TRACT	4	BLCA
HS578T_BREAST	4	BRCA
HUH28_BILIARY_TRACT	4	CHOL
SNU1079_BILIARY_TRACT	4	CHOL
MDST8_LARGE_INTESTINE	4	COAD/READ
SF126_CENTRAL_NERVOUS_SYSTEM	4	GBM
BECKER_CENTRAL_NERVOUS_SYSTEM	4	GBM
SF295_CENTRAL_NERVOUS_SYSTEM	4	GBM
M059K_CENTRAL_NERVOUS_SYSTEM	4	GBM
KNS60_CENTRAL_NERVOUS_SYSTEM	4	GBM
AM38_CENTRAL_NERVOUS_SYSTEM	4	GBM
U118MG_CENTRAL_NERVOUS_SYSTEM	4	GBM
GB1_CENTRAL_NERVOUS_SYSTEM	4	GBM
A172_CENTRAL_NERVOUS_SYSTEM	4	GBM
42MGBA_CENTRAL_NERVOUS_SYSTEM	4	GBM
YKG1_CENTRAL_NERVOUS_SYSTEM	4	GBM
U251MG_CENTRAL_NERVOUS_SYSTEM	4	GBM
8MGBA_CENTRAL_NERVOUS_SYSTEM	4	GBM
U87MG_CENTRAL_NERVOUS_SYSTEM	4	GBM
SF268_CENTRAL_NERVOUS_SYSTEM	4	GBM
GI1_CENTRAL_NERVOUS_SYSTEM	4	LGG
H4_CENTRAL_NERVOUS_SYSTEM	4	LGG
GAMG_CENTRAL_NERVOUS_SYSTEM	4	LGG
SF539_CENTRAL_NERVOUS_SYSTEM	4	LGG
HLF_LIVER	4	LIHC
JHH4_LIVER	4	LIHC
SNU398_LIVER	4	LIHC
SNU475_LIVER	4	LIHC
PLCPRF5_LIVER	4	LIHC
CORL105_LUNG	4	LUAD
DAOY_CENTRAL_NERVOUS_SYSTEM	4	MB
ONS76_CENTRAL_NERVOUS_SYSTEM	4	MB
ACCMESO1_PLEURA	4	MESO
JHOM1_OVARY	4	OV
ES2_OVARY	4	OV
HT1080_SOFT_TISSUE	4	SARC
U2OS_BONE	4	SARC
RH30_SOFT_TISSUE	4	SARC
SW1353_BONE	4	SARC
S117_THYROID	4	SARC
NCIH1339_LUNG	4	SCLC
NCIH196_LUNG	4	SCLC
NCIH446_LUNG	4	SCLC
HMCB_SKIN	4	SKCM
LOXIMVI_SKIN	4	SKCM
LMSU_STOMACH	4	STAD
GSS_STOMACH	4	STAD
SH10TC_STOMACH	4	STAD
FTC238_THYROID	4	THCA
FTC133_THYROID	4	THCA
SW579_THYROID	4	THCA
8305C_THYROID	4	THCA
8505C_THYROID	4	THCA
BHT101_THYROID	4	THCA
BCPAP_THYROID	4	THCA
HS675T_FIBROBLAST	5	COAD/READ	67
HS698T_FIBROBLAST	5	COAD/READ
KNS81_CENTRAL_NERVOUS_SYSTEM	5	GBM
KG1C_CENTRAL_NERVOUS_SYSTEM	5	GBM
CAS1_CENTRAL_NERVOUS_SYSTEM	5	GBM
YH13_CENTRAL_NERVOUS_SYSTEM	5	GBM
DKMG_CENTRAL_NERVOUS_SYSTEM	5	GBM
SNU489_CENTRAL_NERVOUS_SYSTEM	5	GBM
SNU201_CENTRAL_NERVOUS_SYSTEM	5	GBM
SNU1105_CENTRAL_NERVOUS_SYSTEM	5	GBM
SNU626_CENTRAL_NERVOUS_SYSTEM	5	GBM
CCFSTTG1_CENTRAL_NERVOUS_SYSTEM	5	GBM
SW1088_CENTRAL_NERVOUS_SYSTEM	5	GBM
DBTRG05MG_CENTRAL_NERVOUS_SYSTEM	5	GBM
GMS10_CENTRAL_NERVOUS_SYSTEM	5	GBM
SNB75_CENTRAL_NERVOUS_SYSTEM	5	GBM
KALS1_CENTRAL_NERVOUS_SYSTEM	5	LGG
NMCG1_CENTRAL_NERVOUS_SYSTEM	5	LGG
HS618T_FIBROBLAST	5	LUAD
HS229T_FIBROBLAST	5	LUAD
HLFA_FIBROBLAST	5	LUSC
D283MED_CENTRAL_NERVOUS_SYSTEM	5	MB
D341MED_CENTRAL_NERVOUS_SYSTEM	5	MB
MSTO211H_PLEURA	5	MESO
NCIH2052_PLEURA	5	MESO
NCIH2452_PLEURA	5	MESO
ISTMES2_PLEURA	5	MESO
JL1_PLEURA	5	MESO
KPNRTBM1_AUTONOMIC_GANGLIA	5	NB
KPNSI9S_AUTONOMIC_GANGLIA	5	NB
SKNSH_AUTONOMIC_GANGLIA	5	NB
SKNFI_AUTONOMIC_GANGLIA	5	NB
SKNAS_AUTONOMIC_GANGLIA	5	NB
IMR32_AUTONOMIC_GANGLIA	5	NB
KPNYN_AUTONOMIC_GANGLIA	5	NB
SKNBE2_AUTONOMIC_GANGLIA	5	NB
SKNDZ_AUTONOMIC_GANGLIA	5	NB
CHP212_AUTONOMIC_GANGLIA	5	NB
CHP126_AUTONOMIC_GANGLIA	5	NB
NB1_AUTONOMIC_GANGLIA	5	NB
SIMA_AUTONOMIC_GANGLIA	5	NB
ONCODG1_OVARY	5	OV
HOS_BONE	5	SARC
OUMS27_BONE	5	SARC
T173_FIBROBLAST	5	SARC
HS870T_FIBROBLAST	5	SARC
SJSA1_BONE	5	SARC
A673_BONE	5	SARC
SKNMC_BONE	5	SARC
RDES_BONE	5	SARC
SAOS2_BONE	5	SARC
SKES1_BONE	5	SARC
MG63_BONE	5	SARC
G292CLONEA141B1_BONE	5	SARC
HS729_SOFT_TISSUE	5	SARC
RD_SOFT_TISSUE	5	SARC
TE441T_SOFT_TISSUE	5	SARC
CADOES1_BONE	5	SARC
RH18_SOFT_TISSUE	5	SARC
NCIH2227_LUNG	5	SCLC
NCIH82_LUNG	5	SCLC
HS940T_FIBROBLAST	5	SKCM
HS839T_FIBROBLAST	5	SKCM
HS688AT_FIBROBLAST	5	SKCM
HS934T_FIBROBLAST	5	SKCM
COLO684_ENDOMETRIUM	5	UCEC
SNU685_ENDOMETRIUM	5	UCEC
SUPT1_HAEMATOPOIETIC_AND_LYMPHOID_TISSUE	6	ALL	64
SUPB15_HAEMATOPOIETIC_AND_LYMPHOID_TISSUE	6	ALL
TALL1_HAEMATOPOIETIC_AND_LYMPHOID_TISSUE	6	ALL
RS411_HAEMATOPOIETIC_AND_LYMPHOID_TISSUE	6	ALL
PEER_HAEMATOPOIETIC_AND_LYMPHOID_TISSUE	6	ALL
LOUCY_HAEMATOPOIETIC_AND_LYMPHOID_TISSUE	6	ALL
REH_HAEMATOPOIETIC_AND_LYMPHOID_TISSUE	6	ALL
SEM_HAEMATOPOIETIC_AND_LYMPHOID_TISSUE	6	ALL
MOLT13_HAEMATOPOIETIC_AND_LYMPHOID_TISSUE	6	ALL
ALLSIL_HAEMATOPOIETIC_AND_LYMPHOID_TISSUE	6	ALL
KASUMI2_HAEMATOPOIETIC_AND_LYMPHOID_TISSUE	6	ALL
DND41_HAEMATOPOIETIC_AND_LYMPHOID_TISSUE	6	ALL
NALM19_HAEMATOPOIETIC_AND_LYMPHOID_TISSUE	6	ALL
HPBALL_HAEMATOPOIETIC_AND_LYMPHOID_TISSUE	6	ALL
NALM6_HAEMATOPOIETIC_AND_LYMPHOID_TISSUE	6	ALL
PF382_HAEMATOPOIETIC_AND_LYMPHOID_TISSUE	6	ALL
MHHCALL3_HAEMATOPOIETIC_AND_LYMPHOID_TISSUE	6	ALL
MHHCALL4_HAEMATOPOIETIC_AND_LYMPHOID_TISSUE	6	ALL
KOPN8_HAEMATOPOIETIC_AND_LYMPHOID_TISSUE	6	ALL
RPMI8402_HAEMATOPOIETIC_AND_LYMPHOID_TISSUE	6	ALL
P12ICHIKAWA_HAEMATOPOIETIC_AND_LYMPHOID_TISSUE	6	ALL
JURKAT_HAEMATOPOIETIC_AND_LYMPHOID_TISSUE	6	ALL
697_HAEMATOPOIETIC_AND_LYMPHOID_TISSUE	6	ALL
MHHCALL2_HAEMATOPOIETIC_AND_LYMPHOID_TISSUE	6	ALL
MOLT16_HAEMATOPOIETIC_AND_LYMPHOID_TISSUE	6	ALL
RCHACV_HAEMATOPOIETIC_AND_LYMPHOID_TISSUE	6	ALL
MOLT3_HAEMATOPOIETIC_AND_LYMPHOID_TISSUE	6	ALL
U937_HAEMATOPOIETIC_AND_LYMPHOID_TISSUE	6	DLBC
GRANTA519_HAEMATOPOIETIC_AND_LYMPHOID_TISSUE	6	DLBC
AML193_HAEMATOPOIETIC_AND_LYMPHOID_TISSUE	6	LAML
HEL_HAEMATOPOIETIC_AND_LYMPHOID_TISSUE	6	LAML
KO52_HAEMATOPOIETIC_AND_LYMPHOID_TISSUE	6	LAML
HEL9217_HAEMATOPOIETIC_AND_LYMPHOID_TISSUE	6	LAML
THP1_HAEMATOPOIETIC_AND_LYMPHOID_TISSUE	6	LAML
GDM1_HAEMATOPOIETIC_AND_LYMPHOID_TISSUE	6	LAML
SKM1_HAEMATOPOIETIC_AND_LYMPHOID_TISSUE	6	LAML
KG1_HAEMATOPOIETIC_AND_LYMPHOID_TISSUE	6	LAML
HL60_HAEMATOPOIETIC_AND_LYMPHOID_TISSUE	6	LAML
MOLM13_HAEMATOPOIETIC_AND_LYMPHOID_TISSUE	6	LAML
TF1_HAEMATOPOIETIC_AND_LYMPHOID_TISSUE	6	LAML
ME1_HAEMATOPOIETIC_AND_LYMPHOID_TISSUE	6	LAML
OCIAML3_HAEMATOPOIETIC_AND_LYMPHOID_TISSUE	6	LAML
KASUMI6_HAEMATOPOIETIC_AND_LYMPHOID_TISSUE	6	LAML
EOL1_HAEMATOPOIETIC_AND_LYMPHOID_TISSUE	6	LAML
MONOMAC1_HAEMATOPOIETIC_AND_LYMPHOID_TISSUE	6	LAML
PL21_HAEMATOPOIETIC_AND_LYMPHOID_TISSUE	6	LAML
OCIAML2_HAEMATOPOIETIC_AND_LYMPHOID_TISSUE	6	LAML
NOMO1_HAEMATOPOIETIC_AND_LYMPHOID_TISSUE	6	LAML
M07E_HAEMATOPOIETIC_AND_LYMPHOID_TISSUE	6	LAML
NB4_HAEMATOPOIETIC_AND_LYMPHOID_TISSUE	6	LAML
OCIM1_HAEMATOPOIETIC_AND_LYMPHOID_TISSUE	6	LAML
MOLM16_HAEMATOPOIETIC_AND_LYMPHOID_TISSUE	6	LAML
F36P_HAEMATOPOIETIC_AND_LYMPHOID_TISSUE	6	LAML
NCO2_HAEMATOPOIETIC_AND_LYMPHOID_TISSUE	6	LCML
KYO1_HAEMATOPOIETIC_AND_LYMPHOID_TISSUE	6	LCML
MOLM6_HAEMATOPOIETIC_AND_LYMPHOID_TISSUE	6	LCML
LAMA84_HAEMATOPOIETIC_AND_LYMPHOID_TISSUE	6	LCML
CMLT1_HAEMATOPOIETIC_AND_LYMPHOID_TISSUE	6	LCML
BV173_HAEMATOPOIETIC_AND_LYMPHOID_TISSUE	6	LCML
NALM1_HAEMATOPOIETIC_AND_LYMPHOID_TISSUE	6	LCML
JURLMK1_HAEMATOPOIETIC_AND_LYMPHOID_TISSUE	6	LCML
JK1_HAEMATOPOIETIC_AND_LYMPHOID_TISSUE	6	LCML
KU812_HAEMATOPOIETIC_AND_LYMPHOID_TISSUE	6	LCML
EM2_HAEMATOPOIETIC_AND_LYMPHOID_TISSUE	6	LCML
LN229_CENTRAL_NERVOUS_SYSTEM	7	GBM	47
SIGM5_HAEMATOPOIETIC_AND_LYMPHOID_TISSUE	7	LAML
GCT_SOFT_TISSUE	7	SARC
RVH421_SKIN	7	SKCM
SKMEL1_SKIN	7	SKCM
HS936T_SKIN	7	SKCM
SKMEL28_SKIN	7	SKCM
SH4_SKIN	7	SKCM
WM115_SKIN	7	SKCM
COLO800_SKIN	7	SKCM
UACC62_SKIN	7	SKCM
RPMI7951_SKIN	7	SKCM
COLO783_SKIN	7	SKCM
COLO792_SKIN	7	SKCM
WM983B_SKIN	7	SKCM
WM793_SKIN	7	SKCM
WM1799_SKIN	7	SKCM
WM88_SKIN	7	SKCM
IGR1_SKIN	7	SKCM
A2058_SKIN	7	SKCM
IGR39_SKIN	7	SKCM
HT144_SKIN	7	SKCM
SKMEL31_SKIN	7	SKCM
HS939T_SKIN	7	SKCM
A101D_SKIN	7	SKCM
COLO829_SKIN	7	SKCM
SKMEL24_SKIN	7	SKCM
K029AX_SKIN	7	SKCM
HS695T_SKIN	7	SKCM
SKMEL3_SKIN	7	SKCM
MALME3M_SKIN	7	SKCM
MELJUSO_SKIN	7	SKCM
SKMEL2_SKIN	7	SKCM
COLO679_SKIN	7	SKCM
MELHO_SKIN	7	SKCM
G361_SKIN	7	SKCM
COLO741_SKIN	7	SKCM
SKMEL30_SKIN	7	SKCM
C32_SKIN	7	SKCM
A375_SKIN	7	SKCM
HS294T_SKIN	7	SKCM
SKMEL5_SKIN	7	SKCM
HS944T_SKIN	7	SKCM
WM2664_SKIN	7	SKCM
UACC257_SKIN	7	SKCM
IGR37_SKIN	7	SKCM
HS852T_SKIN	7	SKCM
MOTN1_HAEMATOPOIETIC_AND_LYMPHOID_TISSUE	8	ALL	138
JMSU1_URINARY_TRACT	8	BLCA
SW1710_URINARY_TRACT	8	BLCA
HCC2157_BREAST	8	BRCA
HMC18_BREAST	8	BRCA
MDAMB436_BREAST	8	BRCA
HCC1143_BREAST	8	BRCA
HCC1937_BREAST	8	BRCA
HCC1569_BREAST	8	BRCA
HCC1395_BREAST	8	BRCA
HCC1187_BREAST	8	BRCA
HCC70_BREAST	8	BRCA
MDAMB157_BREAST	8	BRCA
BT549_BREAST	8	BRCA
CAL851_BREAST	8	BRCA
HCC1806_BREAST	8	BRCA
HCC1599_BREAST	8	BRCA
CAL51_BREAST	8	BRCA
CAL120_BREAST	8	BRCA
RKO_LARGE_INTESTINE	8	COAD/READ
BICR31_UPPER_AERODIGESTIVE_TRACT	8	HNSC
SNU46_UPPER_AERODIGESTIVE_TRACT	8	HNSC
CAKI1_KIDNEY	8	KIRC
TUHR4TKB_KIDNEY	8	KIRC
RCC10RGB_KIDNEY	8	KIRC
OSRC2_KIDNEY	8	KIRC
SNU1272_KIDNEY	8	KIRC
TUHR14TKB_KIDNEY	8	KIRC
TUHR10TKB_KIDNEY	8	KIRC
KMRC20_KIDNEY	8	KIRC
VMRCRCW_KIDNEY	8	KIRC
A498_KIDNEY	8	KIRC
A704_KIDNEY	8	KIRC
KMRC3_KIDNEY	8	KIRC
769P_KIDNEY	8	KIRC
786O_KIDNEY	8	KIRC
VMRCRCZ_KIDNEY	8	KIRC
ACHN_KIDNEY	8	KIRC
KMRC2_KIDNEY	8	KIRC
KMRC1_KIDNEY	8	KIRC
CAL54_KIDNEY	8	KIRC
UO31_KIDNEY	8	KIRC
CMK_HAEMATOPOIETIC_AND_LYMPHOID_TISSUE	8	LAML
SNU449_LIVER	8	LIHC
HUH6_LIVER	8	LIHC
SNU761_LIVER	8	LIHC
LI7_LIVER	8	LIHC
HUH7_LIVER	8	LIHC
SNU182_LIVER	8	LIHC
SNU423_LIVER	8	LIHC
SNU387_LIVER	8	LIHC
SNU886_LIVER	8	LIHC
SNU878_LIVER	8	LIHC
HEP3B217_LIVER	8	LIHC
HEPG2_LIVER	8	LIHC
HUH1_LIVER	8	LIHC
NCIH1651_LUNG	8	LUAD
RERFLCMS_LUNG	8	LUAD
NCIH1793_LUNG	8	LUAD
NCIH2023_LUNG	8	LUAD
NCIH23_LUNG	8	LUAD
NCIH2030_LUNG	8	LUAD
A549_LUNG	8	LUAD
NCIH522_LUNG	8	LUAD
HCC4006_LUNG	8	LUAD
NCIH1944_LUNG	8	LUAD
HOP62_LUNG	8	LUAD
EPLC272H_LUNG	8	LUSC
NCIH2170_LUNG	8	LUSC
NCIH28_PLEURA	8	MESO
COV318_OVARY	8	OV
JHOC5_OVARY	8	OV
OVK18_OVARY	8	OV
SNU119_OVARY	8	OV
OVTOKO_OVARY	8	OV
OVCAR4_OVARY	8	OV
CAOV4_OVARY	8	OV
COV504_OVARY	8	OV
SKOV3_OVARY	8	OV
NIHOVCAR3_OVARY	8	OV
COV362_OVARY	8	OV
COV434_OVARY	8	OV
OV7_OVARY	8	OV
OAW42_OVARY	8	OV
OAW28_OVARY	8	OV
OVCAR8_OVARY	8	OV
OVMANA_OVARY	8	OV
SNU8_OVARY	8	OV
JHOS2_OVARY	8	OV
CAOV3_OVARY	8	OV
EFO27_OVARY	8	OV
A2780_OVARY	8	OV
IGROV1_OVARY	8	OV
TOV21G_OVARY	8	OV
OVSAHO_OVARY	8	OV
FUOV1_OVARY	8	OV
TYKNU_OVARY	8	OV
OVISE_OVARY	8	OV
OVKATE_OVARY	8	OV
TOV112D_OVARY	8	OV
EFO21_OVARY	8	OV
DOV13_OVARY	8	OV
RMGI_OVARY	8	OV
PK45H_PANCREAS	8	PAAD
SKUT1_SOFT_TISSUE	8	SARC
A204_SOFT_TISSUE	8	SARC
MESSA_SOFT_TISSUE	8	SARC
G401_SOFT_TISSUE	8	SARC
KYM1_SOFT_TISSUE	8	SARC
TE617T_SOFT_TISSUE	8	SARC
G402_SOFT_TISSUE	8	SARC
SW1271_LUNG	8	SCLC
NCIH2286_LUNG	8	SCLC
NCIH2081_LUNG	8	SCLC
DMS114_LUNG	8	SCLC
NCIH524_LUNG	8	SCLC
SBC5_LUNG	8	SCLC
NCIH2196_LUNG	8	SCLC
NCIH841_LUNG	8	SCLC
FU97_STOMACH	8	STAD
HGC27_STOMACH	8	STAD
SNU1_STOMACH	8	STAD
CAL62_THYROID	8	THCA
ML1_THYROID	8	THCA
HEC1B_ENDOMETRIUM	8	UCEC
SNU1077_ENDOMETRIUM	8	UCEC
JHUEM3_ENDOMETRIUM	8	UCEC
MFE296_ENDOMETRIUM	8	UCEC
EFE184_ENDOMETRIUM	8	UCEC
HEC50B_ENDOMETRIUM	8	UCEC
TEN_ENDOMETRIUM	8	UCEC
HEC251_ENDOMETRIUM	8	UCEC
HEC59_ENDOMETRIUM	8	UCEC
EN_ENDOMETRIUM	8	UCEC
ESS1_ENDOMETRIUM	8	UCEC
HEC1A_ENDOMETRIUM	8	UCEC
JHUEM2_ENDOMETRIUM	8	UCEC
JHUEM7_ENDOMETRIUM	8	UCEC
J82_URINARY_TRACT	9	BLCA	141
T24_URINARY_TRACT	9	BLCA
UMUC1_URINARY_TRACT	9	BLCA
SW780_URINARY_TRACT	9	BLCA
RT112_URINARY_TRACT	9	BLCA
VMCUB1_URINARY_TRACT	9	BLCA
639V_URINARY_TRACT	9	BLCA
647V_URINARY_TRACT	9	BLCA
MDAMB175VII_BREAST	9	BRCA
T47D_BREAST	9	BRCA
KPL1_BREAST	9	BRCA
MDAMB231_BREAST	9	BRCA
HCC2218_BREAST	9	BRCA
HCC1954_BREAST	9	BRCA
CAMA1_BREAST	9	BRCA
AU565_BREAST	9	BRCA
BT20_BREAST	9	BRCA
MDAMB361_BREAST	9	BRCA
SKBR3_BREAST	9	BRCA
ZR751_BREAST	9	BRCA
MCF7_BREAST	9	BRCA
HCC202_BREAST	9	BRCA
EFM192A_BREAST	9	BRCA
EFM19_BREAST	9	BRCA
BT474_BREAST	9	BRCA
MDAMB415_BREAST	9	BRCA
MDAMB468_BREAST	9	BRCA
UACC812_BREAST	9	BRCA
MDAMB134VI_BREAST	9	BRCA
HCC1500_BREAST	9	BRCA
UACC893_BREAST	9	BRCA
HDQP1_BREAST	9	BRCA
HCC1419_BREAST	9	BRCA
BT483_BREAST	9	BRCA
HCC1428_BREAST	9	BRCA
ZR7530_BREAST	9	BRCA
SNU308_BILIARY_TRACT	9	CHOL
SNU478_BILIARY_TRACT	9	CHOL
OUMS23_LARGE_INTESTINE	9	COAD/READ
TE4_OESOPHAGUS	9	ESCA
OE19_OESOPHAGUS	9	ESCA
KYSE30_OESOPHAGUS	9	ESCA
SCC15_UPPER_AERODIGESTIVE_TRACT	9	HNSC
BFTC909_KIDNEY	9	KIRC
P31FUJ_HAEMATOPOIETIC_AND_LYMPHOID_TISSUE	9	LAML
SKHEP1_LIVER	9	LIHC
RERFLCAD2_LUNG	9	LUAD
NCIH2347_LUNG	9	LUAD
NCIH2087_LUNG	9	LUAD
NCIH2085_LUNG	9	LUAD
NCIH2342_LUNG	9	LUAD
NCIH322_LUNG	9	LUAD
NCIH2291_LUNG	9	LUAD
HCC2279_LUNG	9	LUAD
NCIH838_LUNG	9	LUAD
NCIH2228_LUNG	9	LUAD
SKLU1_LUNG	9	LUAD
MORCPR_LUNG	9	LUAD
NCIH1568_LUNG	9	LUAD
NCIH358_LUNG	9	LUAD
NCIH1650_LUNG	9	LUAD
NCIH1792_LUNG	9	LUAD
HCC2108_LUNG	9	LUAD
NCIH596_LUNG	9	LUAD
NCIH650_LUNG	9	LUAD
HCC366_LUNG	9	LUAD
NCIH3255_LUNG	9	LUAD
HCC1195_LUNG	9	LUAD
NCIH1648_LUNG	9	LUAD
NCIH1373_LUNG	9	LUAD
NCIH1623_LUNG	9	LUAD
NCIH1838_LUNG	9	LUAD
RERFLCKJ_LUNG	9	LUAD
NCIH441_LUNG	9	LUAD
NCIH2122_LUNG	9	LUAD
NCIH1975_LUNG	9	LUAD
NCIH647_LUNG	9	LUAD
HCC44_LUNG	9	LUAD
HCC78_LUNG	9	LUAD
RERFLCAD1_LUNG	9	LUAD
ABC1_LUNG	9	LUAD
NCIH1781_LUNG	9	LUAD
NCIH2126_LUNG	9	LUAD
HCC827_LUNG	9	LUAD
LXF289_LUNG	9	LUAD
CALU3_LUNG	9	LUAD
NCIH2009_LUNG	9	LUAD
NCIH2405_LUNG	9	LUAD
EKVX_LUNG	9	LUAD
EBC1_LUNG	9	LUSC
RERFLCAI_LUNG	9	LUSC
SKMES1_LUNG	9	LUSC
HCC15_LUNG	9	LUSC
SW900_LUNG	9	LUSC
SW1573_LUNG	9	LUSC
LOUNH91_LUNG	9	LUSC
CALU1_LUNG	9	LUSC
SQ1_LUNG	9	LUSC
OV56_OVARY	9	OV
RMUGS_OVARY	9	OV
COV644_OVARY	9	OV
SNU840_OVARY	9	OV
HEYA8_OVARY	9	OV
SW1990_PANCREAS	9	PAAD
PANC1_PANCREAS	9	PAAD
SU8686_PANCREAS	9	PAAD
PANC0203_PANCREAS	9	PAAD
SNU324_PANCREAS	9	PAAD
SNU213_PANCREAS	9	PAAD
DANG_PANCREAS	9	PAAD
CFPAC1_PANCREAS	9	PAAD
PANC0213_PANCREAS	9	PAAD
YAPC_PANCREAS	9	PAAD
SNU410_PANCREAS	9	PAAD
T3M4_PANCREAS	9	PAAD
PK1_PANCREAS	9	PAAD
PANC0504_PANCREAS	9	PAAD
CAPAN2_PANCREAS	9	PAAD
PANC1005_PANCREAS	9	PAAD
L33_PANCREAS	9	PAAD
PANC0327_PANCREAS	9	PAAD
TCCPAN2_PANCREAS	9	PAAD
DU145_PROSTATE	9	PRAD
RKN_SOFT_TISSUE	9	SARC
RERFGC1B_STOMACH	9	STAD
HS746T_STOMACH	9	STAD
GCIY_STOMACH	9	STAD
MKN1_STOMACH	9	STAD
HUG1N_STOMACH	9	STAD
NUGC4_STOMACH	9	STAD
SNU668_STOMACH	9	STAD
NCCSTCK140_STOMACH	9	STAD
NUGC2_STOMACH	9	STAD
MKN7_STOMACH	9	STAD
TT2609C02_THYROID	9	THCA
SNGM_ENDOMETRIUM	9	UCEC
HEC151_ENDOMETRIUM	9	UCEC
RL952_ENDOMETRIUM	9	UCEC
HEC108_ENDOMETRIUM	9	UCEC
HEC265_ENDOMETRIUM	9	UCEC
HEC6_ENDOMETRIUM	9	UCEC
5637_URINARY_TRACT	10	BLCA	54
KMBC2_URINARY_TRACT	10	BLCA
SCABER_URINARY_TRACT	10	BLCA
RT4_URINARY_TRACT	10	BLCA
CAL29_URINARY_TRACT	10	BLCA
BFTC905_URINARY_TRACT	10	BLCA
BC3C_URINARY_TRACT	10	BLCA
SNU503_LARGE_INTESTINE	10	COAD/READ
TE10_OESOPHAGUS	10	ESCA
TE6_OESOPHAGUS	10	ESCA
ECGI10_OESOPHAGUS	10	ESCA
TE14_OESOPHAGUS	10	ESCA
TE8_OESOPHAGUS	10	ESCA
TE9_OESOPHAGUS	10	ESCA
TT_OESOPHAGUS	10	ESCA
TE11_OESOPHAGUS	10	ESCA
TE1_OESOPHAGUS	10	ESCA
TE5_OESOPHAGUS	10	ESCA
TE15_OESOPHAGUS	10	ESCA
COLO680N_OESOPHAGUS	10	ESCA
OE21_OESOPHAGUS	10	ESCA
BICR56_UPPER_AERODIGESTIVE_TRACT	10	HNSC
BICR16_UPPER_AERODIGESTIVE_TRACT	10	HNSC
BICR6_UPPER_AERODIGESTIVE_TRACT	10	HNSC
BHY_UPPER_AERODIGESTIVE_TRACT	10	HNSC
SNU1214_UPPER_AERODIGESTIVE_TRACT	10	HNSC
BICR22_UPPER_AERODIGESTIVE_TRACT	10	HNSC
BICR18_UPPER_AERODIGESTIVE_TRACT	10	HNSC
YD15_SALIVARY_GLAND	10	HNSC
YD10B_UPPER_AERODIGESTIVE_TRACT	10	HNSC
HSC2_UPPER_AERODIGESTIVE_TRACT	10	HNSC
HSC3_UPPER_AERODIGESTIVE_TRACT	10	HNSC
HSC4_UPPER_AERODIGESTIVE_TRACT	10	HNSC
FADU_UPPER_AERODIGESTIVE_TRACT	10	HNSC
CAL27_UPPER_AERODIGESTIVE_TRACT	10	HNSC
SCC9_UPPER_AERODIGESTIVE_TRACT	10	HNSC
SCC4_UPPER_AERODIGESTIVE_TRACT	10	HNSC
PECAPJ15_UPPER_AERODIGESTIVE_TRACT	10	HNSC
PECAPJ49_UPPER_AERODIGESTIVE_TRACT	10	HNSC
PECAPJ34CLONEC12_UPPER_AERODIGESTIVE_TRACT	10	HNSC
PECAPJ41CLONED2_UPPER_AERODIGESTIVE_TRACT	10	HNSC
A253_SALIVARY_GLAND	10	HNSC
CAL33_UPPER_AERODIGESTIVE_TRACT	10	HNSC
SNU1076_UPPER_AERODIGESTIVE_TRACT	10	HNSC
YD38_UPPER_AERODIGESTIVE_TRACT	10	HNSC
YD8_UPPER_AERODIGESTIVE_TRACT	10	HNSC
SNU899_UPPER_AERODIGESTIVE_TRACT	10	HNSC
DETROIT562_UPPER_AERODIGESTIVE_TRACT	10	HNSC
SCC25_UPPER_AERODIGESTIVE_TRACT	10	HNSC
OCIAML5_HAEMATOPOIETIC_AND_LYMPHOID_TISSUE	10	LAML
HARA_LUNG	10	LUSC
HCC95_LUNG	10	LUSC
LC1F_LUNG	10	LUSC
CJM_SKIN	10	SKCM
