# Supplementary material for: Exploring the classification of cancer cell lines from multiple omic views
Source: PeerJ. 2020 Aug 18;8:e9440. doi: 10.7717/peerj.9440 (PMC7441922; doi:10.7717/peerj.9440)
Supplement: Table S6 [file peerj-08-9440-s011.xlsx]

## Sheet: Sheet1
Table S6： SNF-CC cluster membership.
Cell lines	SNF-CC cluster	TCGA disease	Number of cell lines
DU4475_BREAST	1	BRCA	36
QGP1_PANCREAS	1	PAAD
DMS53_LUNG	1	SCLC
NCIH1184_LUNG	1	SCLC
NCIH2066_LUNG	1	SCLC
NCIH2029_LUNG	1	SCLC
HCC33_LUNG	1	SCLC
COLO668_LUNG	1	SCLC
DMS454_LUNG	1	SCLC
CORL311_LUNG	1	SCLC
NCIH2081_LUNG	1	SCLC
NCIH1092_LUNG	1	SCLC
NCIH1436_LUNG	1	SCLC
NCIH1876_LUNG	1	SCLC
CORL24_LUNG	1	SCLC
CORL88_LUNG	1	SCLC
CORL95_LUNG	1	SCLC
CORL279_LUNG	1	SCLC
DMS153_LUNG	1	SCLC
NCIH1618_LUNG	1	SCLC
NCIH69_LUNG	1	SCLC
NCIH1930_LUNG	1	SCLC
NCIH1836_LUNG	1	SCLC
NCIH209_LUNG	1	SCLC
NCIH889_LUNG	1	SCLC
NCIH211_LUNG	1	SCLC
NCIH2171_LUNG	1	SCLC
NCIH146_LUNG	1	SCLC
DMS79_LUNG	1	SCLC
NCIH526_LUNG	1	SCLC
NCIH2196_LUNG	1	SCLC
SCLC21H_LUNG	1	SCLC
SHP77_LUNG	1	SCLC
ECC10_STOMACH	1	STAD
ECC12_STOMACH	1	STAD
TT_THYROID	1	THCA
HS578T_BREAST	2	BRCA	47
HCC1395_BREAST	2	BRCA
MDAMB157_BREAST	2	BRCA
MDST8_LARGE_INTESTINE	2	COAD/READ
SF126_CENTRAL_NERVOUS_SYSTEM	2	GBM
SF295_CENTRAL_NERVOUS_SYSTEM	2	GBM
M059K_CENTRAL_NERVOUS_SYSTEM	2	GBM
KNS60_CENTRAL_NERVOUS_SYSTEM	2	GBM
KNS81_CENTRAL_NERVOUS_SYSTEM	2	GBM
KG1C_CENTRAL_NERVOUS_SYSTEM	2	GBM
CAS1_CENTRAL_NERVOUS_SYSTEM	2	GBM
YH13_CENTRAL_NERVOUS_SYSTEM	2	GBM
DKMG_CENTRAL_NERVOUS_SYSTEM	2	GBM
GB1_CENTRAL_NERVOUS_SYSTEM	2	GBM
SNU489_CENTRAL_NERVOUS_SYSTEM	2	GBM
SNU201_CENTRAL_NERVOUS_SYSTEM	2	GBM
SNU1105_CENTRAL_NERVOUS_SYSTEM	2	GBM
SNU626_CENTRAL_NERVOUS_SYSTEM	2	GBM
CCFSTTG1_CENTRAL_NERVOUS_SYSTEM	2	GBM
SW1088_CENTRAL_NERVOUS_SYSTEM	2	GBM
DBTRG05MG_CENTRAL_NERVOUS_SYSTEM	2	GBM
A172_CENTRAL_NERVOUS_SYSTEM	2	GBM
GMS10_CENTRAL_NERVOUS_SYSTEM	2	GBM
42MGBA_CENTRAL_NERVOUS_SYSTEM	2	GBM
YKG1_CENTRAL_NERVOUS_SYSTEM	2	GBM
U251MG_CENTRAL_NERVOUS_SYSTEM	2	GBM
8MGBA_CENTRAL_NERVOUS_SYSTEM	2	GBM
U87MG_CENTRAL_NERVOUS_SYSTEM	2	GBM
SF268_CENTRAL_NERVOUS_SYSTEM	2	GBM
SNB75_CENTRAL_NERVOUS_SYSTEM	2	GBM
SNU475_LIVER	2	LIHC
JHOM1_OVARY	2	OV
SJSA1_BONE	2	SARC
RH30_SOFT_TISSUE	2	SARC
G292CLONEA141B1_BONE	2	SARC
HS729_SOFT_TISSUE	2	SARC
SW1353_BONE	2	SARC
RD_SOFT_TISSUE	2	SARC
RH18_SOFT_TISSUE	2	SARC
NCIH196_LUNG	2	SCLC
RPMI7951_SKIN	2	SKCM
IGR39_SKIN	2	SKCM
GSS_STOMACH	2	STAD
FTC238_THYROID	2	THCA
FTC133_THYROID	2	THCA
SW579_THYROID	2	THCA
SNU685_ENDOMETRIUM	2	UCEC
647V_URINARY_TRACT	3	BLCA	58
CAL851_BREAST	3	BRCA
SW480_LARGE_INTESTINE	3	COAD/READ
LS123_LARGE_INTESTINE	3	COAD/READ
SNU1197_LARGE_INTESTINE	3	COAD/READ
SNUC5_LARGE_INTESTINE	3	COAD/READ
SW837_LARGE_INTESTINE	3	COAD/READ
NCIH747_LARGE_INTESTINE	3	COAD/READ
RERFLCAD2_LUNG	3	LUAD
NCIH2347_LUNG	3	LUAD
NCIH2087_LUNG	3	LUAD
NCIH2291_LUNG	3	LUAD
CORL105_LUNG	3	LUAD
NCIH2228_LUNG	3	LUAD
NCIH358_LUNG	3	LUAD
NCIH596_LUNG	3	LUAD
HCC1195_LUNG	3	LUAD
NCIH1648_LUNG	3	LUAD
NCIH1373_LUNG	3	LUAD
NCIH441_LUNG	3	LUAD
NCIH1975_LUNG	3	LUAD
HCC78_LUNG	3	LUAD
RERFLCAD1_LUNG	3	LUAD
HCC827_LUNG	3	LUAD
CALU3_LUNG	3	LUAD
NCIH2009_LUNG	3	LUAD
HCC4006_LUNG	3	LUAD
EBC1_LUNG	3	LUSC
HCC15_LUNG	3	LUSC
SW900_LUNG	3	LUSC
COV644_OVARY	3	OV
MCAS_OVARY	3	OV
SW1990_PANCREAS	3	PAAD
HPAC_PANCREAS	3	PAAD
SU8686_PANCREAS	3	PAAD
PANC0203_PANCREAS	3	PAAD
SNU324_PANCREAS	3	PAAD
SNU213_PANCREAS	3	PAAD
PATU8902_PANCREAS	3	PAAD
DANG_PANCREAS	3	PAAD
HUPT3_PANCREAS	3	PAAD
HPAFII_PANCREAS	3	PAAD
CFPAC1_PANCREAS	3	PAAD
SUIT2_PANCREAS	3	PAAD
YAPC_PANCREAS	3	PAAD
PANC0813_PANCREAS	3	PAAD
PK1_PANCREAS	3	PAAD
PANC0504_PANCREAS	3	PAAD
CAPAN2_PANCREAS	3	PAAD
PANC1005_PANCREAS	3	PAAD
ASPC1_PANCREAS	3	PAAD
PANC0403_PANCREAS	3	PAAD
PANC0327_PANCREAS	3	PAAD
TCCPAN2_PANCREAS	3	PAAD
NCIN87_STOMACH	3	STAD
SNU5_STOMACH	3	STAD
NUGC3_STOMACH	3	STAD
MKN7_STOMACH	3	STAD
SUPT1_HAEMATOPOIETIC_AND_LYMPHOID_TISSUE	4	ALL	15
TALL1_HAEMATOPOIETIC_AND_LYMPHOID_TISSUE	4	ALL
PEER_HAEMATOPOIETIC_AND_LYMPHOID_TISSUE	4	ALL
LOUCY_HAEMATOPOIETIC_AND_LYMPHOID_TISSUE	4	ALL
DND41_HAEMATOPOIETIC_AND_LYMPHOID_TISSUE	4	ALL
HPBALL_HAEMATOPOIETIC_AND_LYMPHOID_TISSUE	4	ALL
PF382_HAEMATOPOIETIC_AND_LYMPHOID_TISSUE	4	ALL
RPMI8402_HAEMATOPOIETIC_AND_LYMPHOID_TISSUE	4	ALL
P12ICHIKAWA_HAEMATOPOIETIC_AND_LYMPHOID_TISSUE	4	ALL
JURKAT_HAEMATOPOIETIC_AND_LYMPHOID_TISSUE	4	ALL
MOLT16_HAEMATOPOIETIC_AND_LYMPHOID_TISSUE	4	ALL
SNUC2A_LARGE_INTESTINE	4	COAD/READ
CMLT1_HAEMATOPOIETIC_AND_LYMPHOID_TISSUE	4	LCML
EFO27_OVARY	4	OV
SNU1_STOMACH	4	STAD
5637_URINARY_TRACT	5	BLCA	53
UMUC1_URINARY_TRACT	5	BLCA
SCABER_URINARY_TRACT	5	BLCA
VMCUB1_URINARY_TRACT	5	BLCA
CAL29_URINARY_TRACT	5	BLCA
BFTC905_URINARY_TRACT	5	BLCA
BC3C_URINARY_TRACT	5	BLCA
HDQP1_BREAST	5	BRCA
TE10_OESOPHAGUS	5	ESCA
ECGI10_OESOPHAGUS	5	ESCA
TE14_OESOPHAGUS	5	ESCA
TE8_OESOPHAGUS	5	ESCA
TE9_OESOPHAGUS	5	ESCA
TT_OESOPHAGUS	5	ESCA
TE11_OESOPHAGUS	5	ESCA
TE5_OESOPHAGUS	5	ESCA
TE15_OESOPHAGUS	5	ESCA
COLO680N_OESOPHAGUS	5	ESCA
OE21_OESOPHAGUS	5	ESCA
BICR16_UPPER_AERODIGESTIVE_TRACT	5	HNSC
BICR6_UPPER_AERODIGESTIVE_TRACT	5	HNSC
BHY_UPPER_AERODIGESTIVE_TRACT	5	HNSC
SNU1214_UPPER_AERODIGESTIVE_TRACT	5	HNSC
BICR22_UPPER_AERODIGESTIVE_TRACT	5	HNSC
YD15_SALIVARY_GLAND	5	HNSC
YD10B_UPPER_AERODIGESTIVE_TRACT	5	HNSC
HSC2_UPPER_AERODIGESTIVE_TRACT	5	HNSC
HSC3_UPPER_AERODIGESTIVE_TRACT	5	HNSC
HSC4_UPPER_AERODIGESTIVE_TRACT	5	HNSC
FADU_UPPER_AERODIGESTIVE_TRACT	5	HNSC
CAL27_UPPER_AERODIGESTIVE_TRACT	5	HNSC
SCC9_UPPER_AERODIGESTIVE_TRACT	5	HNSC
SCC4_UPPER_AERODIGESTIVE_TRACT	5	HNSC
BICR31_UPPER_AERODIGESTIVE_TRACT	5	HNSC
PECAPJ15_UPPER_AERODIGESTIVE_TRACT	5	HNSC
PECAPJ49_UPPER_AERODIGESTIVE_TRACT	5	HNSC
PECAPJ34CLONEC12_UPPER_AERODIGESTIVE_TRACT	5	HNSC
PECAPJ41CLONED2_UPPER_AERODIGESTIVE_TRACT	5	HNSC
A253_SALIVARY_GLAND	5	HNSC
CAL33_UPPER_AERODIGESTIVE_TRACT	5	HNSC
SNU1076_UPPER_AERODIGESTIVE_TRACT	5	HNSC
YD38_UPPER_AERODIGESTIVE_TRACT	5	HNSC
SNU899_UPPER_AERODIGESTIVE_TRACT	5	HNSC
DETROIT562_UPPER_AERODIGESTIVE_TRACT	5	HNSC
SCC25_UPPER_AERODIGESTIVE_TRACT	5	HNSC
SCC15_UPPER_AERODIGESTIVE_TRACT	5	HNSC
HARA_LUNG	5	LUSC
HCC95_LUNG	5	LUSC
BXPC3_PANCREAS	5	PAAD
T3M4_PANCREAS	5	PAAD
L33_PANCREAS	5	PAAD
CJM_SKIN	5	SKCM
NUGC2_STOMACH	5	STAD
HMC18_BREAST	6	BRCA	28
CAL51_BREAST	6	BRCA
COLO320_LARGE_INTESTINE	6	COAD/READ
SNU398_LIVER	6	LIHC
NCIH23_LUNG	6	LUAD
NCIH522_LUNG	6	LUAD
OVK18_OVARY	6	OV
COV434_OVARY	6	OV
TOV21G_OVARY	6	OV
TOV112D_OVARY	6	OV
SKUT1_SOFT_TISSUE	6	SARC
A204_SOFT_TISSUE	6	SARC
A673_BONE	6	SARC
SKNMC_BONE	6	SARC
RDES_BONE	6	SARC
MESSA_SOFT_TISSUE	6	SARC
G401_SOFT_TISSUE	6	SARC
SKES1_BONE	6	SARC
TE617T_SOFT_TISSUE	6	SARC
G402_SOFT_TISSUE	6	SARC
TE441T_SOFT_TISSUE	6	SARC
SBC5_LUNG	6	SCLC
NCIH841_LUNG	6	SCLC
HMCB_SKIN	6	SKCM
HGC27_STOMACH	6	STAD
MFE296_ENDOMETRIUM	6	UCEC
EN_ENDOMETRIUM	6	UCEC
JHUEM2_ENDOMETRIUM	6	UCEC
MDAMB175VII_BREAST	7	BRCA	24
T47D_BREAST	7	BRCA
KPL1_BREAST	7	BRCA
HCC2218_BREAST	7	BRCA
CAMA1_BREAST	7	BRCA
AU565_BREAST	7	BRCA
MDAMB361_BREAST	7	BRCA
SKBR3_BREAST	7	BRCA
ZR751_BREAST	7	BRCA
MCF7_BREAST	7	BRCA
HCC202_BREAST	7	BRCA
EFM192A_BREAST	7	BRCA
EFM19_BREAST	7	BRCA
BT474_BREAST	7	BRCA
MDAMB415_BREAST	7	BRCA
UACC812_BREAST	7	BRCA
MDAMB134VI_BREAST	7	BRCA
HCC1500_BREAST	7	BRCA
HCC1599_BREAST	7	BRCA
UACC893_BREAST	7	BRCA
HCC1419_BREAST	7	BRCA
BT483_BREAST	7	BRCA
HCC1428_BREAST	7	BRCA
ZR7530_BREAST	7	BRCA
SUPB15_HAEMATOPOIETIC_AND_LYMPHOID_TISSUE	8	ALL	16
RS411_HAEMATOPOIETIC_AND_LYMPHOID_TISSUE	8	ALL
REH_HAEMATOPOIETIC_AND_LYMPHOID_TISSUE	8	ALL
SEM_HAEMATOPOIETIC_AND_LYMPHOID_TISSUE	8	ALL
KASUMI2_HAEMATOPOIETIC_AND_LYMPHOID_TISSUE	8	ALL
NALM19_HAEMATOPOIETIC_AND_LYMPHOID_TISSUE	8	ALL
NALM6_HAEMATOPOIETIC_AND_LYMPHOID_TISSUE	8	ALL
MHHCALL3_HAEMATOPOIETIC_AND_LYMPHOID_TISSUE	8	ALL
MHHCALL4_HAEMATOPOIETIC_AND_LYMPHOID_TISSUE	8	ALL
KOPN8_HAEMATOPOIETIC_AND_LYMPHOID_TISSUE	8	ALL
697_HAEMATOPOIETIC_AND_LYMPHOID_TISSUE	8	ALL
MHHCALL2_HAEMATOPOIETIC_AND_LYMPHOID_TISSUE	8	ALL
RCHACV_HAEMATOPOIETIC_AND_LYMPHOID_TISSUE	8	ALL
OCILY19_HAEMATOPOIETIC_AND_LYMPHOID_TISSUE	8	DLBC
BV173_HAEMATOPOIETIC_AND_LYMPHOID_TISSUE	8	LCML
NALM1_HAEMATOPOIETIC_AND_LYMPHOID_TISSUE	8	LCML
HEL_HAEMATOPOIETIC_AND_LYMPHOID_TISSUE	9	LAML	13
HEL9217_HAEMATOPOIETIC_AND_LYMPHOID_TISSUE	9	LAML
CMK_HAEMATOPOIETIC_AND_LYMPHOID_TISSUE	9	LAML
TF1_HAEMATOPOIETIC_AND_LYMPHOID_TISSUE	9	LAML
M07E_HAEMATOPOIETIC_AND_LYMPHOID_TISSUE	9	LAML
OCIM1_HAEMATOPOIETIC_AND_LYMPHOID_TISSUE	9	LAML
MOLM16_HAEMATOPOIETIC_AND_LYMPHOID_TISSUE	9	LAML
F36P_HAEMATOPOIETIC_AND_LYMPHOID_TISSUE	9	LAML
NCO2_HAEMATOPOIETIC_AND_LYMPHOID_TISSUE	9	LCML
KYO1_HAEMATOPOIETIC_AND_LYMPHOID_TISSUE	9	LCML
LAMA84_HAEMATOPOIETIC_AND_LYMPHOID_TISSUE	9	LCML
JK1_HAEMATOPOIETIC_AND_LYMPHOID_TISSUE	9	LCML
KU812_HAEMATOPOIETIC_AND_LYMPHOID_TISSUE	9	LCML
HH_HAEMATOPOIETIC_AND_LYMPHOID_TISSUE	10	ALL	22
A4FUK_HAEMATOPOIETIC_AND_LYMPHOID_TISSUE	10	DLBC
A3KAW_HAEMATOPOIETIC_AND_LYMPHOID_TISSUE	10	DLBC
BCP1_HAEMATOPOIETIC_AND_LYMPHOID_TISSUE	10	DLBC
KMS21BM_HAEMATOPOIETIC_AND_LYMPHOID_TISSUE	10	MM
KMS27_HAEMATOPOIETIC_AND_LYMPHOID_TISSUE	10	MM
KMS28BM_HAEMATOPOIETIC_AND_LYMPHOID_TISSUE	10	MM
KHM1B_HAEMATOPOIETIC_AND_LYMPHOID_TISSUE	10	MM
KMS11_HAEMATOPOIETIC_AND_LYMPHOID_TISSUE	10	MM
U266B1_HAEMATOPOIETIC_AND_LYMPHOID_TISSUE	10	MM
KMM1_HAEMATOPOIETIC_AND_LYMPHOID_TISSUE	10	MM
NCIH929_HAEMATOPOIETIC_AND_LYMPHOID_TISSUE	10	MM
MM1S_HAEMATOPOIETIC_AND_LYMPHOID_TISSUE	10	MM
RPMI8226_HAEMATOPOIETIC_AND_LYMPHOID_TISSUE	10	MM
MOLP2_HAEMATOPOIETIC_AND_LYMPHOID_TISSUE	10	MM
SKMM2_HAEMATOPOIETIC_AND_LYMPHOID_TISSUE	10	MM
LP1_HAEMATOPOIETIC_AND_LYMPHOID_TISSUE	10	MM
OPM2_HAEMATOPOIETIC_AND_LYMPHOID_TISSUE	10	MM
L363_HAEMATOPOIETIC_AND_LYMPHOID_TISSUE	10	MM
EJM_HAEMATOPOIETIC_AND_LYMPHOID_TISSUE	10	MM
AMO1_HAEMATOPOIETIC_AND_LYMPHOID_TISSUE	10	MM
MOLP8_HAEMATOPOIETIC_AND_LYMPHOID_TISSUE	10	MM
SW1116_LARGE_INTESTINE	11	COAD/READ	47
NCIH508_LARGE_INTESTINE	11	COAD/READ
CW2_LARGE_INTESTINE	11	COAD/READ
SNU61_LARGE_INTESTINE	11	COAD/READ
HT115_LARGE_INTESTINE	11	COAD/READ
SNUC4_LARGE_INTESTINE	11	COAD/READ
HCT15_LARGE_INTESTINE	11	COAD/READ
SW1463_LARGE_INTESTINE	11	COAD/READ
CCK81_LARGE_INTESTINE	11	COAD/READ
LS513_LARGE_INTESTINE	11	COAD/READ
GP2D_LARGE_INTESTINE	11	COAD/READ
SKCO1_LARGE_INTESTINE	11	COAD/READ
SNU81_LARGE_INTESTINE	11	COAD/READ
SNU1040_LARGE_INTESTINE	11	COAD/READ
SNU175_LARGE_INTESTINE	11	COAD/READ
SNU407_LARGE_INTESTINE	11	COAD/READ
SNU283_LARGE_INTESTINE	11	COAD/READ
HCC56_LARGE_INTESTINE	11	COAD/READ
RCM1_LARGE_INTESTINE	11	COAD/READ
SNUC1_LARGE_INTESTINE	11	COAD/READ
SW620_LARGE_INTESTINE	11	COAD/READ
LS411N_LARGE_INTESTINE	11	COAD/READ
LOVO_LARGE_INTESTINE	11	COAD/READ
SW48_LARGE_INTESTINE	11	COAD/READ
LS180_LARGE_INTESTINE	11	COAD/READ
SW403_LARGE_INTESTINE	11	COAD/READ
SW1417_LARGE_INTESTINE	11	COAD/READ
SW948_LARGE_INTESTINE	11	COAD/READ
T84_LARGE_INTESTINE	11	COAD/READ
CL14_LARGE_INTESTINE	11	COAD/READ
CL40_LARGE_INTESTINE	11	COAD/READ
CL11_LARGE_INTESTINE	11	COAD/READ
CL34_LARGE_INTESTINE	11	COAD/READ
OE19_OESOPHAGUS	11	ESCA
NCIH854_LUNG	11	LUAD
DV90_LUNG	11	LUAD
PATU8988S_PANCREAS	11	PAAD
TGBC11TKB_STOMACH	11	STAD
SNU520_STOMACH	11	STAD
SNU620_STOMACH	11	STAD
GSU_STOMACH	11	STAD
HUG1N_STOMACH	11	STAD
NUGC4_STOMACH	11	STAD
OCUM1_STOMACH	11	STAD
SNU601_STOMACH	11	STAD
SNU719_STOMACH	11	STAD
2313287_STOMACH	11	STAD
BDCM_HAEMATOPOIETIC_AND_LYMPHOID_TISSUE	12	ALL	32
P3HR1_HAEMATOPOIETIC_AND_LYMPHOID_TISSUE	12	DLBC
TOLEDO_HAEMATOPOIETIC_AND_LYMPHOID_TISSUE	12	DLBC
RAJI_HAEMATOPOIETIC_AND_LYMPHOID_TISSUE	12	DLBC
BL41_HAEMATOPOIETIC_AND_LYMPHOID_TISSUE	12	DLBC
CA46_HAEMATOPOIETIC_AND_LYMPHOID_TISSUE	12	DLBC
DB_HAEMATOPOIETIC_AND_LYMPHOID_TISSUE	12	DLBC
GA10_HAEMATOPOIETIC_AND_LYMPHOID_TISSUE	12	DLBC
EB1_HAEMATOPOIETIC_AND_LYMPHOID_TISSUE	12	DLBC
DAUDI_HAEMATOPOIETIC_AND_LYMPHOID_TISSUE	12	DLBC
HT_HAEMATOPOIETIC_AND_LYMPHOID_TISSUE	12	DLBC
JM1_HAEMATOPOIETIC_AND_LYMPHOID_TISSUE	12	DLBC
NAMALWA_HAEMATOPOIETIC_AND_LYMPHOID_TISSUE	12	DLBC
SUDHL8_HAEMATOPOIETIC_AND_LYMPHOID_TISSUE	12	DLBC
OCILY3_HAEMATOPOIETIC_AND_LYMPHOID_TISSUE	12	DLBC
BL70_HAEMATOPOIETIC_AND_LYMPHOID_TISSUE	12	DLBC
CI1_HAEMATOPOIETIC_AND_LYMPHOID_TISSUE	12	DLBC
ST486_HAEMATOPOIETIC_AND_LYMPHOID_TISSUE	12	DLBC
RL_HAEMATOPOIETIC_AND_LYMPHOID_TISSUE	12	DLBC
GRANTA519_HAEMATOPOIETIC_AND_LYMPHOID_TISSUE	12	DLBC
JEKO1_HAEMATOPOIETIC_AND_LYMPHOID_TISSUE	12	DLBC
NUDHL1_HAEMATOPOIETIC_AND_LYMPHOID_TISSUE	12	DLBC
SUDHL10_HAEMATOPOIETIC_AND_LYMPHOID_TISSUE	12	DLBC
SUDHL4_HAEMATOPOIETIC_AND_LYMPHOID_TISSUE	12	DLBC
DOHH2_HAEMATOPOIETIC_AND_LYMPHOID_TISSUE	12	DLBC
RI1_HAEMATOPOIETIC_AND_LYMPHOID_TISSUE	12	DLBC
KARPAS422_HAEMATOPOIETIC_AND_LYMPHOID_TISSUE	12	DLBC
PFEIFFER_HAEMATOPOIETIC_AND_LYMPHOID_TISSUE	12	DLBC
NUDUL1_HAEMATOPOIETIC_AND_LYMPHOID_TISSUE	12	DLBC
SUDHL6_HAEMATOPOIETIC_AND_LYMPHOID_TISSUE	12	DLBC
REC1_HAEMATOPOIETIC_AND_LYMPHOID_TISSUE	12	DLBC
WSUDLCL2_HAEMATOPOIETIC_AND_LYMPHOID_TISSUE	12	DLBC
UMUC3_URINARY_TRACT	13	BLCA	83
J82_URINARY_TRACT	13	BLCA
T24_URINARY_TRACT	13	BLCA
TCCSUP_URINARY_TRACT	13	BLCA
JMSU1_URINARY_TRACT	13	BLCA
639V_URINARY_TRACT	13	BLCA
MDAMB231_BREAST	13	BRCA
MDAMB436_BREAST	13	BRCA
CAL120_BREAST	13	BRCA
AM38_CENTRAL_NERVOUS_SYSTEM	13	GBM
SNU46_UPPER_AERODIGESTIVE_TRACT	13	HNSC
YD8_UPPER_AERODIGESTIVE_TRACT	13	HNSC
SNU761_LIVER	13	LIHC
LI7_LIVER	13	LIHC
HLF_LIVER	13	LIHC
JHH4_LIVER	13	LIHC
SNU423_LIVER	13	LIHC
SNU387_LIVER	13	LIHC
SKHEP1_LIVER	13	LIHC
SNU886_LIVER	13	LIHC
SNU878_LIVER	13	LIHC
PLCPRF5_LIVER	13	LIHC
HUH1_LIVER	13	LIHC
NCIH1651_LUNG	13	LUAD
HCC2279_LUNG	13	LUAD
NCIH838_LUNG	13	LUAD
CALU6_LUNG	13	LUAD
SKLU1_LUNG	13	LUAD
RERFLCMS_LUNG	13	LUAD
NCIH1793_LUNG	13	LUAD
NCIH1792_LUNG	13	LUAD
NCIH650_LUNG	13	LUAD
HCC366_LUNG	13	LUAD
NCIH2023_LUNG	13	LUAD
NCIH2030_LUNG	13	LUAD
A549_LUNG	13	LUAD
NCIH647_LUNG	13	LUAD
HCC44_LUNG	13	LUAD
LXF289_LUNG	13	LUAD
NCIH1944_LUNG	13	LUAD
NCIH2405_LUNG	13	LUAD
HOP62_LUNG	13	LUAD
EKVX_LUNG	13	LUAD
RERFLCAI_LUNG	13	LUSC
SKMES1_LUNG	13	LUSC
SW1573_LUNG	13	LUSC
LOUNH91_LUNG	13	LUSC
CALU1_LUNG	13	LUSC
OV56_OVARY	13	OV
COV362_OVARY	13	OV
OV7_OVARY	13	OV
OVCAR8_OVARY	13	OV
HEYA8_OVARY	13	OV
ES2_OVARY	13	OV
PANC1_PANCREAS	13	PAAD
SNU410_PANCREAS	13	PAAD
PK45H_PANCREAS	13	PAAD
HS766T_PANCREAS	13	PAAD
PSN1_PANCREAS	13	PAAD
PATU8988T_PANCREAS	13	PAAD
HOS_BONE	13	SARC
RKN_SOFT_TISSUE	13	SARC
HT1080_SOFT_TISSUE	13	SARC
GCT_SOFT_TISSUE	13	SARC
U2OS_BONE	13	SARC
MG63_BONE	13	SARC
SW1271_LUNG	13	SCLC
NCIH2286_LUNG	13	SCLC
NCIH1339_LUNG	13	SCLC
LOXIMVI_SKIN	13	SKCM
HS746T_STOMACH	13	STAD
LMSU_STOMACH	13	STAD
SH10TC_STOMACH	13	STAD
MKN1_STOMACH	13	STAD
SNU668_STOMACH	13	STAD
8305C_THYROID	13	THCA
8505C_THYROID	13	THCA
CAL62_THYROID	13	THCA
BHT101_THYROID	13	THCA
BCPAP_THYROID	13	THCA
TT2609C02_THYROID	13	THCA
ML1_THYROID	13	THCA
ESS1_ENDOMETRIUM	13	UCEC
AML193_HAEMATOPOIETIC_AND_LYMPHOID_TISSUE	14	LAML	22
P31FUJ_HAEMATOPOIETIC_AND_LYMPHOID_TISSUE	14	LAML
KO52_HAEMATOPOIETIC_AND_LYMPHOID_TISSUE	14	LAML
THP1_HAEMATOPOIETIC_AND_LYMPHOID_TISSUE	14	LAML
GDM1_HAEMATOPOIETIC_AND_LYMPHOID_TISSUE	14	LAML
SKM1_HAEMATOPOIETIC_AND_LYMPHOID_TISSUE	14	LAML
KG1_HAEMATOPOIETIC_AND_LYMPHOID_TISSUE	14	LAML
HL60_HAEMATOPOIETIC_AND_LYMPHOID_TISSUE	14	LAML
MOLM13_HAEMATOPOIETIC_AND_LYMPHOID_TISSUE	14	LAML
ME1_HAEMATOPOIETIC_AND_LYMPHOID_TISSUE	14	LAML
OCIAML3_HAEMATOPOIETIC_AND_LYMPHOID_TISSUE	14	LAML
KASUMI6_HAEMATOPOIETIC_AND_LYMPHOID_TISSUE	14	LAML
EOL1_HAEMATOPOIETIC_AND_LYMPHOID_TISSUE	14	LAML
MONOMAC1_HAEMATOPOIETIC_AND_LYMPHOID_TISSUE	14	LAML
PL21_HAEMATOPOIETIC_AND_LYMPHOID_TISSUE	14	LAML
OCIAML2_HAEMATOPOIETIC_AND_LYMPHOID_TISSUE	14	LAML
OCIAML5_HAEMATOPOIETIC_AND_LYMPHOID_TISSUE	14	LAML
NOMO1_HAEMATOPOIETIC_AND_LYMPHOID_TISSUE	14	LAML
NB4_HAEMATOPOIETIC_AND_LYMPHOID_TISSUE	14	LAML
SIGM5_HAEMATOPOIETIC_AND_LYMPHOID_TISSUE	14	LAML
MOLM6_HAEMATOPOIETIC_AND_LYMPHOID_TISSUE	14	LCML
EM2_HAEMATOPOIETIC_AND_LYMPHOID_TISSUE	14	LCML
LN229_CENTRAL_NERVOUS_SYSTEM	15	GBM	42
RVH421_SKIN	15	SKCM
SKMEL1_SKIN	15	SKCM
HS936T_SKIN	15	SKCM
SKMEL28_SKIN	15	SKCM
SH4_SKIN	15	SKCM
WM115_SKIN	15	SKCM
COLO800_SKIN	15	SKCM
UACC62_SKIN	15	SKCM
COLO783_SKIN	15	SKCM
COLO792_SKIN	15	SKCM
WM983B_SKIN	15	SKCM
WM793_SKIN	15	SKCM
WM1799_SKIN	15	SKCM
WM88_SKIN	15	SKCM
IGR1_SKIN	15	SKCM
A2058_SKIN	15	SKCM
HT144_SKIN	15	SKCM
SKMEL31_SKIN	15	SKCM
HS939T_SKIN	15	SKCM
A101D_SKIN	15	SKCM
COLO829_SKIN	15	SKCM
SKMEL24_SKIN	15	SKCM
K029AX_SKIN	15	SKCM
HS695T_SKIN	15	SKCM
SKMEL3_SKIN	15	SKCM
MALME3M_SKIN	15	SKCM
MELJUSO_SKIN	15	SKCM
COLO679_SKIN	15	SKCM
MELHO_SKIN	15	SKCM
G361_SKIN	15	SKCM
COLO741_SKIN	15	SKCM
SKMEL30_SKIN	15	SKCM
C32_SKIN	15	SKCM
A375_SKIN	15	SKCM
HS294T_SKIN	15	SKCM
SKMEL5_SKIN	15	SKCM
HS944T_SKIN	15	SKCM
WM2664_SKIN	15	SKCM
UACC257_SKIN	15	SKCM
IGR37_SKIN	15	SKCM
HS852T_SKIN	15	SKCM
NCIH716_LARGE_INTESTINE	16	COAD/READ	23
NH6_AUTONOMIC_GANGLIA	16	NB
KPNRTBM1_AUTONOMIC_GANGLIA	16	NB
KPNSI9S_AUTONOMIC_GANGLIA	16	NB
SKNSH_AUTONOMIC_GANGLIA	16	NB
SKNFI_AUTONOMIC_GANGLIA	16	NB
SKNAS_AUTONOMIC_GANGLIA	16	NB
IMR32_AUTONOMIC_GANGLIA	16	NB
KPNYN_AUTONOMIC_GANGLIA	16	NB
SKNBE2_AUTONOMIC_GANGLIA	16	NB
SKNDZ_AUTONOMIC_GANGLIA	16	NB
CHP212_AUTONOMIC_GANGLIA	16	NB
CHP126_AUTONOMIC_GANGLIA	16	NB
NB1_AUTONOMIC_GANGLIA	16	NB
SIMA_AUTONOMIC_GANGLIA	16	NB
CADOES1_BONE	16	SARC
NCIH2227_LUNG	16	SCLC
NCIH1341_LUNG	16	SCLC
NCIH82_LUNG	16	SCLC
DMS273_LUNG	16	SCLC
NCIH524_LUNG	16	SCLC
NCIH446_LUNG	16	SCLC
COLO684_ENDOMETRIUM	16	UCEC
SW1710_URINARY_TRACT	17	BLCA	24
CAKI1_KIDNEY	17	KIRC
TUHR4TKB_KIDNEY	17	KIRC
RCC10RGB_KIDNEY	17	KIRC
OSRC2_KIDNEY	17	KIRC
SNU1272_KIDNEY	17	KIRC
TUHR14TKB_KIDNEY	17	KIRC
TUHR10TKB_KIDNEY	17	KIRC
KMRC20_KIDNEY	17	KIRC
VMRCRCW_KIDNEY	17	KIRC
A498_KIDNEY	17	KIRC
A704_KIDNEY	17	KIRC
KMRC3_KIDNEY	17	KIRC
769P_KIDNEY	17	KIRC
786O_KIDNEY	17	KIRC
VMRCRCZ_KIDNEY	17	KIRC
ACHN_KIDNEY	17	KIRC
KMRC2_KIDNEY	17	KIRC
KMRC1_KIDNEY	17	KIRC
UO31_KIDNEY	17	KIRC
SNU449_LIVER	17	LIHC
JHOC5_OVARY	17	OV
OVTOKO_OVARY	17	OV
HEC50B_ENDOMETRIUM	17	UCEC
SW780_URINARY_TRACT	18	BLCA	85
RT4_URINARY_TRACT	18	BLCA
RT112_URINARY_TRACT	18	BLCA
HCC1954_BREAST	18	BRCA
BT20_BREAST	18	BRCA
HCC1143_BREAST	18	BRCA
HCC1937_BREAST	18	BRCA
HCC1569_BREAST	18	BRCA
HCC1187_BREAST	18	BRCA
HCC70_BREAST	18	BRCA
MDAMB468_BREAST	18	BRCA
OUMS23_LARGE_INTESTINE	18	COAD/READ
C2BBE1_LARGE_INTESTINE	18	COAD/READ
SNU503_LARGE_INTESTINE	18	COAD/READ
RKO_LARGE_INTESTINE	18	COAD/READ
HCT116_LARGE_INTESTINE	18	COAD/READ
COLO678_LARGE_INTESTINE	18	COAD/READ
TE6_OESOPHAGUS	18	ESCA
TE4_OESOPHAGUS	18	ESCA
TE1_OESOPHAGUS	18	ESCA
KYSE30_OESOPHAGUS	18	ESCA
BICR18_UPPER_AERODIGESTIVE_TRACT	18	HNSC
HUH7_LIVER	18	LIHC
HEP3B217_LIVER	18	LIHC
HEPG2_LIVER	18	LIHC
NCIH2085_LUNG	18	LUAD
NCIH2342_LUNG	18	LUAD
NCIH322_LUNG	18	LUAD
MORCPR_LUNG	18	LUAD
NCIH1568_LUNG	18	LUAD
NCIH1650_LUNG	18	LUAD
NCIH3255_LUNG	18	LUAD
NCIH1623_LUNG	18	LUAD
RERFLCKJ_LUNG	18	LUAD
NCIH2122_LUNG	18	LUAD
ABC1_LUNG	18	LUAD
NCIH1395_LUNG	18	LUAD
NCIH1781_LUNG	18	LUAD
NCIH2126_LUNG	18	LUAD
LC1F_LUNG	18	LUSC
NCIH2170_LUNG	18	LUSC
RMUGS_OVARY	18	OV
COV318_OVARY	18	OV
SNU119_OVARY	18	OV
OV90_OVARY	18	OV
OVCAR4_OVARY	18	OV
SKOV3_OVARY	18	OV
NIHOVCAR3_OVARY	18	OV
OAW42_OVARY	18	OV
OAW28_OVARY	18	OV
OVMANA_OVARY	18	OV
SNU840_OVARY	18	OV
SNU8_OVARY	18	OV
JHOS2_OVARY	18	OV
CAOV3_OVARY	18	OV
IGROV1_OVARY	18	OV
OVSAHO_OVARY	18	OV
FUOV1_OVARY	18	OV
OVISE_OVARY	18	OV
OVKATE_OVARY	18	OV
EFO21_OVARY	18	OV
RMGI_OVARY	18	OV
ONCODG1_OVARY	18	OV
RERFGC1B_STOMACH	18	STAD
FU97_STOMACH	18	STAD
GCIY_STOMACH	18	STAD
MKN74_STOMACH	18	STAD
NCCSTCK140_STOMACH	18	STAD
SNU216_STOMACH	18	STAD
AGS_STOMACH	18	STAD
SNGM_ENDOMETRIUM	18	UCEC
HEC151_ENDOMETRIUM	18	UCEC
HEC1B_ENDOMETRIUM	18	UCEC
SNU1077_ENDOMETRIUM	18	UCEC
JHUEM3_ENDOMETRIUM	18	UCEC
RL952_ENDOMETRIUM	18	UCEC
EFE184_ENDOMETRIUM	18	UCEC
HEC108_ENDOMETRIUM	18	UCEC
HEC265_ENDOMETRIUM	18	UCEC
HEC6_ENDOMETRIUM	18	UCEC
TEN_ENDOMETRIUM	18	UCEC
HEC251_ENDOMETRIUM	18	UCEC
HEC59_ENDOMETRIUM	18	UCEC
HEC1A_ENDOMETRIUM	18	UCEC
JHUEM7_ENDOMETRIUM	18	UCEC
